# **The Integrator complex regulates microRNA abundance through RISC loading**

Nina Kirstein<sup>1,\*</sup>, Sadat Dokaneheifard<sup>1,\*</sup>, Pradeep Reddy Cingaram<sup>1</sup>, Monica Guiselle Valencia<sup>1</sup>,  
Felipe Beckedorff<sup>1</sup>, Helena Gomes Dos Santos<sup>1</sup>, Ezra Blumenthal<sup>1,2</sup>, Mina Masoumeh Tayari<sup>1</sup>,  
Ramin Shiekhattar<sup>1</sup>

## Affiliations

<sup>1</sup> Department of Human Genetics, University of Miami Miller School of Medicine, Sylvester  
Comprehensive Cancer Center, 1501 NW 10<sup>th</sup> Avenue, Miami, FL 33136

<sup>2</sup> Medical Scientist Training Program and Graduate Program in Cancer Biology, University of  
Miami Miller School of Medicine, Miami, FL, USA

Corresponding author: [rshiekhattar@med.miami.edu](mailto:rshiekhattar@med.miami.edu)

\* Equal contribution

**MicroRNA (miRNA) homeostasis is crucial for the post-transcriptional regulation of their target genes and miRNA dysregulation has been linked to multiple diseases, including cancer. The molecular mechanisms underlying miRNA biogenesis from processing of primary miRNA transcripts to formation of mature miRNA duplex are well understood<sup>1-4</sup>. Loading of miRNA duplex into members of the Argonaute (Ago) protein family, representing the core of the RNA-induced silencing complex (RISC), is pivotal to miRNA-mediated gene silencing<sup>5-7</sup>. The Integrator complex has been previously shown to be an important regulator of RNA maturation, RNA polymerase II pause-release, and premature transcriptional**

23 **termination<sup>8-11</sup>. Here, we report that loss of Integrator results in global diminution of mature**  
24 **miRNAs. By incorporating 4-Thiouridine (s4U) in nascent transcripts, we traced miRNA**  
25 **fate from biogenesis to stabilization and identified Integrator to be essential for proper**  
26 **miRNA assembly into RISC. Enhanced UV crosslinking and immunoprecipitation (eCLIP)**  
27 **of Integrator confirms a robust association with mature miRNAs. Indeed, Integrator**  
28 **potentiates Ago2-mediated cleavage of target RNAs. These findings highlight an essential**  
29 **role for Integrator in miRNA abundance and RISC function.**

30 MiRNAs are a class of non-coding RNAs of an average size of ~22 nucleotides (nt), that are  
31 generated in two independent steps: i) primary miRNAs (pri-miRNAs) are processed by  
32 Microprocessor, composed of Drosha/DGCR8 to precursor (pre-miRNA) hairpins in the  
33 nucleus<sup>2,3,12</sup>, ii) after their export to the cytoplasm, Dicer/TRBP matures miRNA duplexes<sup>13-15</sup>.  
34 Further miRNA stabilization into RISC is critical for modulation of miRNA levels, and  
35 consequently the regulation of miRNA-target mRNA stability and translation. The Integrator  
36 complex is required for the cleavage of stalled RNA Polymerase II (RNAPII) transcripts,  
37 generating small promoter-associated RNAs<sup>10</sup>. The intriguing resemblance of a ~20 nucleotide  
38 sub-population of this small RNA class and miRNAs led us to investigate the effect of Integrator  
39 depletion on miRNAs.

#### 40 **Integrator depletion leads to miRNA loss**

41 We depleted Integrator subunits (INTS, Extended Data Fig. 1a,b) and assessed the levels of mature  
42 miRNAs (n = 205; corresponding to the 200 most expressed miRNAs in shControl treated cells,  
43 extended for Drosha-independent miRNAs) using small RNA sequencing (smRNA-seq).  
44 Strikingly, we observed a global miRNA loss following INTS1, -3, -6, and -11 depletion, while  
45 INTS7 knock-down did not affect miRNA steady state (Fig. 1a,b). We found the strongest effect

46 in absence of INTS6 and INTS11 (Fig. 1a-d, Extended Data Fig. 1c-g), with Drosha-independent  
47 miRNAs also being reduced (e.g.: 5'm<sup>7</sup>G-capped miR-320a-3p<sup>16</sup> or mirtrons miR-877-5p and  
48 miR1226-3p<sup>17</sup>; Fig. 1e,f, Extended Data Fig. 1h,i). We confirmed these findings by Taqman-qPCR  
49 miRNA detection in induced shINTS6 or shINTS11 HeLa cells and siINTS6, siINTS11, or  
50 siDrosha transfected HEK293T cells (Extended Data Fig. 1j,k). Importantly, we did not detect  
51 differential expression of pri-miRNAs, either by assessing nascent transcripts using PRO-seq after  
52 INTS11 knock-down (Extended Data Fig. 2a), or by total RNA-seq (Extended Data Fig. 2b,c).  
53 Concomitantly, while we detected some fluctuations in the expression of components of miRNA  
54 machinery (Extended Data Fig. 2d), and in the abundance of the major miRNA-related proteins  
55 (Extended Data Fig. 2e), no consistent alterations were identified that could explain miRNA loss.  
56 Additionally, we did not observe any changes either in pri-miRNA processing by Drosha/DGCR8  
57 (Extended Data Fig. 2f-h), or in the average lengths of mature miRNAs (Extended Data Fig. 2i).  
58 Finally, miRNA loss was independent of Integrator's endonucleolytic activity, as ectopic  
59 expression of wild-type or catalytic inactive E203Q-mutant INTS11 rescued the phenotype in  
60 shINTS11 cells (Extended Data Fig. 2j-l). These results indicate that while the abundance of  
61 mature miRNAs was controlled by the Integrator, loss of Integrator did not impact the processing  
62 of primary or precursor miRNA.

### 63 **Integrator controls miRNA stabilization**

64 To precisely pinpoint Integrator's role in miRNA fate, we employed thiol (SH)-linked alkylation  
65 for metabolic sequencing of RNA (SLAM-seq) to determine smRNA dynamics<sup>18</sup> following  
66 depletion of INTS6 or INTS11 (Fig. 2a). Briefly, 4-Thiouridine (s4U) was incorporated during  
67 transcription, which was subsequently carboxyamidomethylated (+Iodoacetamide, IAA), allowing  
68 to trace labeled miRNAs via their T>C conversion from a pool of labeled and unlabeled miRNAs

69 (steady state). While 24h of s4U labeling did not affect miRNA levels (Extended Data Fig. 3a,b),  
70 global miRNA loss was still observed upon INTS6 or INTS11 depletion at steady state (Fig. 2b,  
71 Extended Data Fig. 3c,d). T>C labeled miRNAs were only detected in samples treated with s4U  
72 and IAA (Extended Data Fig. 3e-g), with a total number of 126 s4U labeled miRNA captured  
73 containing at least one T>C conversion (Extended Data Fig. 3h,i). Plotting the average RPM (reads  
74 per million) of T>C labeled miRNAs separated for guide (n=32) and passenger (n=32) strand  
75 allowed us to distinguish miRNA biogenesis (15min - 1h), initiation of RISC loading (1h - 3h),  
76 and miRNA stability reflected in differential abundance of guide and passenger strands seen  
77 between 3 to 24 hours in samples treated with shControl (Fig. 2c). Markedly, similar analysis  
78 following INTS6 (Fig. 2d) or INTS11 depletion (Fig. 2e) displayed the decreased separation of  
79 guide and passenger miRNA levels starting at 1h to 3h timepoints and extending throughout the  
80 24 hours. This observation was confirmed when depicting the average of all detected miRNAs (n  
81 = 126; Fig. 2f, Extended Data Fig. 3j). We determined biogenesis ( $k_{\text{bio}}$ ) and accumulation rates  
82 ( $k_{\text{accu}}$ ) by linear regression of T>C labeled miRNAs on early (15min - 1h) or intermediate (1h -  
83 6h) timepoints for either guide or passenger miRNAs (Fig. 2g). While knock-down of INTS6  
84 appeared to result in an increase of passenger miRNA  $k_{\text{bio}}$ , we did not detect any statistically  
85 significant change for either  $k_{\text{bio}}$  of guide or passenger miRNAs following INTS11 or INTS6  
86 depletion (Fig. 2h, upper panel). As expected,  $k_{\text{accu}}$  was significantly larger for guide miRNAs as  
87 compared to that of passenger miRNAs in control knock-down condition, however depletion of  
88 INTS6 or INTS11 abrogated the difference between guide and passenger strand  $k_{\text{accu}}$  (Fig. 2h,  
89 lower panel). Similarly, median half-life estimations by single exponential saturation kinetics  
90 revealed reduced miRNA half-lives following shINTS6 treatment ( $t_{1/2}$ =8.3h) compared to that of

91 shControl ( $t_{1/2}$ =12.4h), with greatest decrease observed following shINTS11 treatment ( $t_{1/2}$ =1.2h),  
92 reflecting a defect in miRNA stabilization in absence of Integrator (Fig. 2i).

### 93 **Integrator loss abolishes RISC loading**

94 MiRNA kinetics indicated that the absence of Integrator impaired miRNA stabilization, suggesting  
95 a role for Integrator in RISC loading. Indeed, analyses of miRNA associated with Ago2 using  
96 Taqman-qPCR following RNA-Immunoprecipitation (RIP), revealed the specific loss of Ago2-  
97 loaded miRNA after INTS11 or INTS6 depletion (Extended Data Fig. 4a,b). We next performed  
98 s4U labeling for 24h followed by Ago2 RIP to detect RISC-loaded miRNAs in shControl,  
99 shINTS6, and shINTS11 treated cells. We observed a decrease in steady state miRNA levels (Fig.  
100 3a), confirming our previous RIP-qPCR results. Ago2 association of T>C labeled, newly generated  
101 miRNAs was significantly reduced upon INTS11 knock-down, with the same tendency for INTS6  
102 (Fig. 3b, Extended Data Fig. 4c), reflecting an impairment of Ago2 loading. Importantly, miRNA  
103 loss was not rescued by concomitant overexpression of Ago2 (Fig. 3c, Extended Data Fig. 4d),  
104 further stressing the importance of Integrator during Ago2 loading.

### 105 **Loss of nuclear and cytoplasmic miRNAs**

106 MiRNA stabilization in RISC is a cytoplasmic event<sup>19-21</sup>. While nuclear miRNA functions have  
107 previously been characterized<sup>22</sup>, they rely on active RISC transport to the nucleus<sup>23,24</sup>. Integrator  
108 has been described as nuclear complex with functions directly linked to active transcription<sup>8-10,25-</sup>  
109 <sup>28</sup>. Integrator is also present in the cytoplasm<sup>29</sup>. However, single INTS were two- (INTS11) to  
110 nine-fold (INTS6) enriched in the nucleus when examining equal amounts of HEK293T or HeLa  
111 nuclear or cytoplasmic extracts (Extended Data Fig. 4e). Furthermore, analyses of smRNA-seq  
112 from nuclear and cytoplasmic fractions following Integrator depletion revealed that miRNA loss

113 was detected in both compartments, albeit stronger in the nucleus (Extended Data Fig. 4f).  
114 Consequently, Integrator acts on miRNA abundance in both cellular compartments.

115 Analysis of miRNA levels revealed a total of 46 miRNAs that were not significantly down-  
116 regulated following either INTS6 or INTS11 depletion (Fig. 3d, 17 miRNAs remain unregulated  
117 in absence of both INTS6 and INTS11). Interestingly, miRNAs down-regulated by Integrator  
118 depletion were significantly more abundant than miRNAs that were less affected by Integrator  
119 perturbations (Fig. 3e) and contained a higher proportion of guide miRNAs (Fig. 3f). These results  
120 further substantiate a cytoplasmic function of Integrator in miRNA stabilization into RISC.

### 121 **Integrator potentiates RISC function**

122 A direct function of Integrator in Ago2 loading suggested an association of Integrator with mature  
123 miRNAs. We performed enhanced UV crosslinking and immunoprecipitation (eCLIP)<sup>30</sup> optimized  
124 for the detection of miRNAs by increasing initial RNase concentrations, targeting INTS11 and its  
125 homolog CPSF73, a member of the cleavage and polyadenylation specificity factor (CPSF)  
126 complex. We detected miRNA binding by INTS11, but not CPSF73, confirming specific  
127 Integrator-miRNA interactions (Fig. 4a). We also detected INTS11 after anti-Flag affinity  
128 purification of Flag-Ago2, overexpressed in HEK293T cells (Extended Data Fig. 5a,b), supporting  
129 a transient interaction between Integrator and Ago2. Importantly, increasing concentrations of  
130 affinity-purified Integrator complex specifically enhanced recombinant Ago2's ability to cleave a  
131 miRNA let-7a complementary sequence upon addition of duplex let-7a miRNA (Fig. 4b,c). Taken  
132 together, Integrator-dependent RISC loading not only modulates the abundance and stability of  
133 miRNAs but also functionally impacts gene silencing by RISC.

134

## 135 Discussion

136 Precise modulation of miRNA balance is crucial during cancer and development<sup>31-33</sup>. Integrator  
137 has previously been identified as critical for *Herpesvirus saimiri* pre-miRNA hairpin  
138 biogenesis<sup>34,35</sup>. While Integrator is enriched in the nucleus, we pinpoint a key function for  
139 Integrator complex in controlling human miRNA abundance in the cytoplasm, by directing their  
140 loading and consequently their stabilization in RISC. Given similar levels of miRNA reduction  
141 upon knock-down of INTS1, -3, -6, and -11, it is likely that multiple Integrator subunits endowed  
142 with RNA interaction domains are involved in RISC loading. Indeed, using eCLIP we showed a  
143 robust association of INTS11 and mature miRNAs. Significantly, functional reconstitution of  
144 miRNA-mediated targeted cleavage by Ago2 revealed a critical function for Integrator in proper  
145 loading of duplex RNA in RISC. These studies widen the scope of function of Integrator beyond  
146 transcriptional control and highlight a role for this complex in post-transcriptional regulation of  
147 gene expression by modulating miRNA stability and abundance.

- 148 1 Bernstein, E., Caudy, A. A., Hammond, S. M. & Hannon, G. J. Role for a bidentate  
149 ribonuclease in the initiation step of RNA interference. *Nature* **409**, 363-366,  
150 doi:10.1038/35053110 (2001).
- 151 2 Denli, A. M., Tops, B. B., Plasterk, R. H., Ketting, R. F. & Hannon, G. J. Processing of  
152 primary microRNAs by the Microprocessor complex. *Nature* **432**, 231-235,  
153 doi:10.1038/nature03049 (2004).
- 154 3 Gregory, R. I. *et al.* The Microprocessor complex mediates the genesis of microRNAs.  
155 *Nature* **432**, 235-240, doi:10.1038/nature03120 (2004).
- 156 4 Ha, M. & Kim, V. N. Regulation of microRNA biogenesis. *Nat Rev Mol Cell Biol* **15**,  
157 509-524, doi:10.1038/nrm3838 (2014).
- 158 5 Hammond, S. M., Bernstein, E., Beach, D. & Hannon, G. J. An RNA-directed nuclease  
159 mediates post-transcriptional gene silencing in *Drosophila* cells. *Nature* **404**, 293-296,  
160 doi:10.1038/35005107 (2000).
- 161 6 Gregory, R. I., Chendrimada, T. P., Cooch, N. & Shiekhattar, R. Human RISC couples  
162 microRNA biogenesis and posttranscriptional gene silencing. *Cell* **123**, 631-640,  
163 doi:10.1016/j.cell.2005.10.022 (2005).
- 164 7 Liu, J. *et al.* Argonaute2 is the catalytic engine of mammalian RNAi. *Science* **305**, 1437-  
165 1441, doi:10.1126/science.1102513 (2004).

- 166 8 Baillat, D. *et al.* Integrator, a Multiprotein Mediator of Small Nuclear RNA Processing,  
167 Associates with the C-Terminal Repeat of RNA Polymerase II. *Cell* **123**, 265-276,  
168 doi:10.1016/j.cell.2005.08.019 (2005).
- 169 9 Skaar, J. R. *et al.* The Integrator complex controls the termination of transcription at  
170 diverse classes of gene targets. *Cell Res* **25**, 288-305, doi:10.1038/cr.2015.19 (2015).
- 171 10 Beckedorff, F. *et al.* The Human Integrator Complex Facilitates Transcriptional  
172 Elongation by Endonucleolytic Cleavage of Nascent Transcripts. *CellReports* **32**, 107917,  
173 doi:10.1016/j.celrep.2020.107917 (2020).
- 174 11 Kirstein, N., Gomes Dos Santos, H., Blumenthal, E. & Shiekhattar, R. The Integrator  
175 complex at the crossroad of coding and noncoding RNA. *Curr Opin Cell Biol* **70**, 37-43,  
176 doi:10.1016/j.ceb.2020.11.003 (2020).
- 177 12 Han, J. *et al.* The Drosha-DGCR8 complex in primary microRNA processing. *Genes Dev*  
178 **18**, 3016-3027, doi:10.1101/gad.1262504 (2004).
- 179 13 Grishok, A. *et al.* Genes and mechanisms related to RNA interference regulate expression  
180 of the small temporal RNAs that control *C. elegans* developmental timing. *Cell* **106**, 23-  
181 34, doi:10.1016/s0092-8674(01)00431-7 (2001).
- 182 14 Wilson, R. C. *et al.* Dicer-TRBP complex formation ensures accurate mammalian  
183 microRNA biogenesis. *Mol Cell* **57**, 397-407, doi:10.1016/j.molcel.2014.11.030 (2015).
- 184 15 Chendrimada, T. P. *et al.* TRBP recruits the Dicer complex to Ago2 for microRNA  
185 processing and gene silencing. *Nature* **436**, 740-744, doi:10.1038/nature03868 (2005).
- 186 16 Xie, M. *et al.* Mammalian 5'-capped microRNA precursors that generate a single  
187 microRNA. *Cell* **155**, 1568-1580, doi:10.1016/j.cell.2013.11.027 (2013).
- 188 17 Sibley, C. R. *et al.* The biogenesis and characterization of mammalian microRNAs of  
189 mirtron origin. *Nucleic Acids Res* **40**, 438-448, doi:10.1093/nar/gkr722 (2012).
- 190 18 Reichholf, B. *et al.* Time-Resolved Small RNA Sequencing Unravels the Molecular  
191 Principles of MicroRNA Homeostasis. *Mol Cell* **75**, 756-768 e757,  
192 doi:10.1016/j.molcel.2019.06.018 (2019).
- 193 19 Hutvagner, G. & Zamore, P. D. A microRNA in a multiple-turnover RNAi enzyme  
194 complex. *Science* **297**, 2056-2060, doi:10.1126/science.1073827 (2002).
- 195 20 Kobayashi, H. & Tomari, Y. RISC assembly: Coordination between small RNAs and  
196 Argonaute proteins. *Biochim Biophys Acta* **1859**, 71-81,  
197 doi:10.1016/j.bbagr.2015.08.007 (2016).
- 198 21 Treiber, T., Treiber, N. & Meister, G. Regulation of microRNA biogenesis and its  
199 crosstalk with other cellular pathways. *Nat Rev Mol Cell Biol* **20**, 5-20,  
200 doi:10.1038/s41580-018-0059-1 (2019).
- 201 22 Sarshad, A. A. *et al.* Argonaute-miRNA Complexes Silence Target mRNAs in the  
202 Nucleus of Mammalian Stem Cells. *Mol Cell* **71**, 1040-1050 e1048,  
203 doi:10.1016/j.molcel.2018.07.020 (2018).
- 204 23 Ohrt, T. *et al.* Fluorescence correlation spectroscopy and fluorescence cross-correlation  
205 spectroscopy reveal the cytoplasmic origination of loaded nuclear RISC in vivo in human  
206 cells. *Nucleic Acids Res* **36**, 6439-6449, doi:10.1093/nar/gkn693 (2008).
- 207 24 Kalantari, R. *et al.* Stable association of RNAi machinery is conserved between the  
208 cytoplasm and nucleus of human cells. *RNA* **22**, 1085-1098, doi:10.1261/rna.056499.116  
209 (2016).



- 210 25 Elrod, N. D. *et al.* The Integrator Complex Attenuates Promoter-Proximal Transcription  
211 at Protein-Coding Genes. *Mol Cell* **76**, 738-752 e737, doi:10.1016/j.molcel.2019.10.034  
212 (2019).
- 213 26 Lai, F., Gardini, A., Zhang, A. & Shiekhattar, R. Integrator mediates the biogenesis of  
214 enhancer RNAs. *Nature* **525**, 399-403, doi:10.1038/nature14906 (2015).
- 215 27 Stadelmayer, B. *et al.* Integrator complex regulates NELF-mediated RNA polymerase II  
216 pause/release and processivity at coding genes. *Nat Commun* **5**, 720,  
217 doi:10.1038/ncomms6531 (2014).
- 218 28 Tatomer, D. C. *et al.* The Integrator complex cleaves nascent mRNAs to attenuate  
219 transcription. *Genes & Development* **33**, 1525-1538, doi:10.1101/gad.330167.119 (2019).
- 220 29 Zheng, H. *et al.* Identification of Integrator-PP2A complex (INTAC), an RNA  
221 polymerase II phosphatase. *Science* **370**, doi:10.1126/science.abb5872 (2020).
- 222 30 Van Nostrand, E. L. *et al.* Robust, Cost-Effective Profiling of RNA Binding Protein  
223 Targets with Single-end Enhanced Crosslinking and Immunoprecipitation (seCLIP).  
224 *Methods Mol Biol* **1648**, 177-200, doi:10.1007/978-1-4939-7204-3\_14 (2017).
- 225 31 Lu, J. *et al.* MicroRNA expression profiles classify human cancers. *Nature* **435**, 834-838,  
226 doi:10.1038/nature03702 (2005).
- 227 32 Greve, T. S., Judson, R. L. & Belloch, R. microRNA control of mouse and human  
228 pluripotent stem cell behavior. *Annu Rev Cell Dev Biol* **29**, 213-239,  
229 doi:10.1146/annurev-cellbio-101512-122343 (2013).
- 230 33 Cui, Y. *et al.* Global miRNA dosage control of embryonic germ layer specification.  
231 *Nature*, doi:10.1038/s41586-021-03524-0 (2021).
- 232 34 Cazalla, D., Xie, M. & Steitz, J. A. A primate herpesvirus uses the integrator complex to  
233 generate viral microRNAs. *Mol Cell* **43**, 982-992, doi:10.1016/j.molcel.2011.07.025  
234 (2011).
- 235 35 Xie, M. *et al.* The host Integrator complex acts in transcription-independent maturation of  
236 herpesvirus microRNA 3' ends. *Genes Dev* **29**, 1552-1564, doi:10.1101/gad.266973.115  
237 (2015).

238

## 239 **Figure Legends**

240 **Fig. 1 | Integrator absence leads to global miRNA loss. a**, Box- and violin plot depicting the  
241 log<sub>2</sub> fold change of 205 expressed miRNAs determined by smRNA-seq in the indicated knock-  
242 down or uninduced shControl HeLa cells, calculated against induced shControl cells. \*\*\* p <  
243 0.001, one-way ANOVA followed by Tukey's post-hoc test. **b**, Global average smRNA-seq  
244 profiles around 112 5p-miRNAs aligned at their start site. **c,d**, Volcano plot comparing statistical  
245 significance and miRNA log<sub>2</sub> fold change between control and knock-down cells. **c**, shINTS6. **d**,

246 shINTS11. **e,f**, SmRNA-seq profiles at Drosha-independent miRNA loci. **e**, 5'-capped miR-320a  
247 locus. **f**, mirtron miR-877 locus.

248 **Fig. 2 | Depletion of Integrator abolishes miRNA stabilization.** **a**, Scheme of INTS knock-down  
249 and s4U labeling. **b**, Steady state (unlabeled and T>C labeled) of miRNA expression over time.  $n$   
250 = 126. **c-e**, T>C labeled miRNA abundance over time, separated for 32 guide or 32 passenger  
251 miRNAs. Mean  $\pm$  SEM. \*  $p < 0.05$ , \*\*  $p < 0.01$ , Mann-Whitney-Wilcoxon test. **c**, shControl. **d**,  
252 shINTS6. **e**, shINTS11. **f**, Combined T>C labeled miRNA abundance. **g**, Example of linear  
253 regression on shControl guide or passenger miRNAs. MiRNA biogenesis rates ( $k_{\text{bio}}$ ) determined  
254 from 15min to 1h, or accumulation rates ( $k_{\text{accu}}$ ) from 1h to 6h. Slope  $\pm$  standard error is indicated.  
255 **h**, Histogram of  $k_{\text{bio}}$  and  $k_{\text{accu}}$ . Mean  $\pm$  SEM. \*\*  $p < 0.01$ , one-way ANOVA followed by Tukey's  
256 post-hoc test on single miRNAs with  $k_{\text{bio}}$  or  $k_{\text{accu}} > 0$ . **i**, Single exponential saturation kinetics to  
257 calculate median half-life  $t_{1/2}$  [h] as depicted in table below including 95% confidence interval.  
258 Shades indicate SEM.

259 **Fig. 3 | Integrator depletion abolishes Ago2 loading.** **a**, Steady state miRNA abundance from  
260 Ago2 RIP after 24h + s4U ( $n = 122$ ). **b**, T>C miRNA percentage. Mean + SEM. **c**, MiRNA  
261 TaqMan qPCR before and after Ago2 overexpression (see Extended Data Fig. 4d). MiRNA levels  
262 relative to ath-miR-159a spike-in and shControl. Mean + SEM,  $n = 3$ . \*\*  $p < 0.01$ , \*\*\*  $p < 0.001$ ,  
263 one-way ANOVA followed by Dunnett's multiple comparisons test. **d**, Scatter plot of the miRNA  
264  $\log_2$  fold change in shINTS6 and shINTS11 from Fig. 1c,d. Integrator-unregulated miRNAs are  
265 indicated by orange shaded area. (R: Spearman correlation coefficient). **e**, shControl miRNA  
266 abundance for unregulated (no) and down-regulated (down) miRNAs. \*  $p < 0.05$ , Welch two  
267 sample t-test. **f**, Percentage of guide and passenger miRNAs. Absolute miRNA numbers are  
268 indicated. \*  $p < 0.05$ , Fisher's exact test.

269 **Fig. 4 | Integrator directly enhances Ago2 target cleavage efficiency. a**, Global average of  
270 INTS11, CPSF73, IgG and size-matched input eCLIP profiles around 112 5p-miRNAs aligned at  
271 their start site. **b**, Ago2 cleavage assay in presence of dme-let-7a miRNA-duplex, 5'IRDye-700  
272 labeled guide-complementary target RNA, Ago2 and increasing concentrations of affinity purified  
273 (Flag-INTS11) Integrator complex. \* cleaved product. **c**, Quantification of the product/target ratio  
274 with increasing amounts of Integrator. Mean + SEM, n = 3.

## 275 **Methods**

### 276 **Cell lines**

277 HeLa (ATCC, #CCL-2) and HEK293T (ATCC, #CRL-3216) cells were maintained in high-  
278 glucose Dulbecco's modified Eagle's medium (DMEM, Gibco, #11965-084), supplemented with  
279 10% fetal bovine serum (FBS, Atlas Biologicals, #F-0500-D) and the respective antibiotics, if  
280 required. Cells were regularly tested for mycoplasma. HeLa inducible shControl (containing an  
281 shRNA targeting GFP), shINTS1, and shINTS11 cells have been previously described in Gardini  
282 *et al.*<sup>36</sup>, shRNA-resistant N-terminal Flag-tagged WT and E203Q mutant INTS11 in Beckedorff *et*  
283 *al.*<sup>10</sup>. HeLa inducible shINTS3, shINTS6, and shINTS7 single clones were established by lentiviral  
284 infection with Tet-pLKO-puro vector (Addgene, #21915) containing the respective shRNA  
285 sequences (shINTS3: GCTGTGACCTCATTCGCTACA, shINTS6:  
286 ACCACTAATGATTCGATAATA, shINTS7: GCAGTAAAGAGACTTGCTATT) and 2.5  
287 µg/ml puromycin (InvivoGen, #ant-pr) selection. shINTS stable cells were maintained in 2 µg/ml  
288 puromycin, WT and E203Q in presence of puromycin and 200 µg/ml G418 (InvivoGen, #ant-gn-  
289 5). shRNA expression was induced by adding Doxycycline (Selleckchem, #S4163) at 1 µg/ml for  
290 three days with medium replaced every 24 h.

### 291 **Cell transfections**

292 HeLa cells were transfected with 20 nmol siControl (Ambion, #4390847), or siDrosha (Ambion,  
293 s26491) using Lipofectamin RNAiMAX (Invitrogen, #13778030) according manufacturer's  
294 instructions. HEK293T cells were transfected with 30 nmol siControl, equimolar amounts of  
295 combined siINTS6 (s25483, s25484), siINTS11 (s29893, s29894, s29895), or siDrosha (s26490,  
296 s26491). For transient Ago2 overexpression in HEK293T cells, 3.2 µg of pFlag-CMV-Ago2

297 plasmid were transfected using Lipofectamine 2000 (Invitrogen, #11668019). Cells were  
298 harvested three days after transfection.

### 299 **Immunoblot detection**

300 Whole-cell RIPA lysates were prepared in presence of Halt protease and phosphatase inhibitor  
301 cocktail (Thermo Scientific, #1861282) and proteins were separated by 4-15% Criterion TGX  
302 Stain-Free precast polyacrylamide gels (Biorad, # 5678084). After transfer on nitrocellulose  
303 membranes, we detected our protein of interest using the following antibodies:  $\alpha$ -INTS1 (Bethyl  
304 Laboratories, #A300-361A),  $\alpha$ -INTS3 (Sigma Prestige, HPA074391),  $\alpha$ -INTS6 (Novus  
305 Biologicals, NB10086990),  $\alpha$ -INTS7 (Bethyl Laboratories, A300-271A),  $\alpha$ -INTS11 (Sigma  
306 Prestige, HPA029025),  $\alpha$ -GAPDH (Abcam, ab8245),  $\alpha$ -Drosha (Abcam, ab12286),  $\alpha$ -Dicer  
307 (Abcam, ab14601),  $\alpha$ -DGCR8 (Abcam, ab90579),  $\alpha$ -Ago1 (Cell Signaling, D84G10),  $\alpha$ -Ago2  
308 (Abcam, ab57113),  $\alpha$ -Ago3 (Sigma-Aldrich, SAB4200112),  $\alpha$ -Ago4 (Cell Signaling, D10F10),  $\alpha$ -  
309 Lamin B1 (Proteintech, #66095-1-1g).

### 310 **Subcellular fractionation**

311 Nuclear and cytoplasmic fractions of HEK293T or HeLa cells were prepared as described in Bhatt  
312 *et al.*<sup>37</sup>. Briefly, cells were lysed in cytoplasmic lysis buffer (10 mM Tris-HCl, 15 mM NaCl,  
313 0.15% NP-40) and layered on a sucrose cushion (10 mM Tris-HCl, 15 mM NaCl, 24% sucrose  
314 w/v), then centrifuged at 3.500g for 10 min at 4°C. Nuclear protein were extracted from the pellet  
315 using RIPA buffer and nuclear and cytoplasmic inserted for immunoblot as described above.

### 316 **RNA isolation**

317 Total RNA was extracted using Trizol reagent (Thermo Fisher Scientific, #15596026) according  
318 to the manufacturer's instructions. Nuclear and cytoplasmic fractions were prepared as described

319 above, Trizol LS reagent (Thermo Fisher Scientific, #10296010) was used for extraction of  
320 cytoplasmic RNA. Genomic DNA was removed by Turbo DNase treatment (Invitrogen,  
321 #AM1907).

### 322 **MiRNA detection by Taqman qPCR**

323 10 ng total RNA containing 5 pM ath-miR-159a spike-in was reverse-transcribed using Taqman  
324 Advanced miRNA cDNA synthesis kit (Applied Biosystems #A28007) and miRNAs were  
325 detected using specific probes for ath-miR159a (478411\_mir), miR-17-5p (478447\_mir), miR-21-  
326 5p (477975\_mir), let-7b-5p (478576\_mir), miR-320a-3p (478594\_mir), miR-877-5p  
327 (478206\_mir), miR-1226-3p (478640\_mir), miR-92a-3p (477827\_mir), miR-30b-5p,  
328 (478007\_mir), miR-19a-5p (478750\_mir), miR-182-5p (477935\_mir), and RNU43\_FAMMGB  
329 (Thermo Fisher, custom order) and SsoAdvanced Universal Probes Supermix (Biorad, #1725281).  
330 Relative miRNA expression was calculated against RNU43 or ath-miR-159a spike-in and  
331 shControl using  $\Delta\Delta\text{ct}$  method.

### 332 **Small RNA library preparation and genome mapping**

333 Small RNA libraries were prepared using the SMARTer smRNA-seq kit (Takara, #635030) with  
334 700ng total RNA. smRNA-seq from nuclear and cytoplasmic RNA was performed from 700 ng  
335 containing 35 ng (5%) of *Drosophila melanogaster* RNA as spike-in. Experiments were performed  
336 in two independent biological replicates that were sequenced together to avoid bias. For better  
337 comparability and to account for multiple sequencing runs, each including their own shControl,  
338 we merged the corresponding fastq files and randomly subsampled for 30 million reads before data  
339 processing. Sequencing reads were trimmed for adapter (AAAAAAAAAAA) as recommend by  
340 SMARTer smRNA-seq kit (Takara, #635030) protocol using Cutadapt<sup>38</sup> (v1.18) and reads shorter  
341 than 17 bp were omitted. Reads were aligned against human elements in RepBase (v23.08) with

342 STAR<sup>39</sup> (v2.5.3a) and the unmapped output then mapped against the human genome (hg19),  
343 allowing three mismatches and keeping all uniquely aligned reads. For UCSC Genome Browser  
344 visualization (<https://genome.ucsc.edu/>,<sup>40</sup>), all tracks were normalized by CPM (counts per  
345 million) using deepTools<sup>241</sup> (v3.2.1).

### 346 **MiRNA detection and data analysis**

347 Known mature miRNA were quantified using mirdeep2<sup>42</sup> (v2.0.0.7) and the top 200 expressed  
348 miRNAs in shControl samples were selected and extended by Drosha-independent miRNAs. The  
349 final list of 205 miRNAs was analyzed in all data sets. Differential expression was calculated using  
350 DESeq2<sup>43</sup> and R<sup>44</sup> (version 3.6.1). Differentially expressed miRNA were determined by a cutoff  
351 of 1.5-fold and q-value of 0.01 (Supplementary Table 1). Significances were either calculated by  
352 DESeq2 or using one-way ANOVA testing followed by Tukey multiple pairwise comparisons in  
353 R. Graphics were generated using ggplot2<sup>45</sup>. Boxplots are represented with the median, the lower  
354 and upper hinges correspond to the first and third quartiles, the whiskers represent 1.5 x the inter-  
355 quartile range to both sides. Global average smRNA-seq profiles were based on bigwig files.  
356 MiRNA lengths were determined by mapping reads after removal of repetitive regions to miRNA  
357 precursors as described below (Small RNA SLAM-seq: Bioinformatic processing) and the mapped  
358 sequence lengths retrieved.

### 359 **Total RNA library preparation and genome mapping**

360 Total RNA-seq libraries were generated using Truseq Stranded Total RNA library preparation kit  
361 (Illumina, #20020596) with 500 ng of DNase-treated RNA, including ribosomal RNA depletion.  
362 Sequencing was performed using Nova-seq to at least 50 million reads. Resulting fastq files were  
363 processed with Trimmomatic<sup>46</sup> v0.32 and aligned to human genome (hg19) using STAR<sup>39</sup> aligner  
364 v2.5.3a with default parameters. For UCSC Genome Browser<sup>40</sup> visualization

365 (<https://genome.ucsc.edu/>), all tracks were normalized by CPM (counts per million) using  
366 deepTools<sup>241</sup> (v3.2.1). RSEM<sup>47</sup> v1.2.31 was used to obtain expected gene counts against the  
367 human Ensembl reference (release 87). Differential expression of shINTS compared to shControl  
368 was determined using DESeq2<sup>43</sup>. MiRNA-related genes were determined by selection relevant  
369 Gene Ontology (GO) terms<sup>48</sup> containing “miRNA” (GO annotations: 0070883, 0070878, 0031054,  
370 0035280, 1990428, 0035196, 2000634, 0031053, 0035281, 2000631) and extracting a list of 42  
371 unique gene names.

### 372 **Pre-miRNA determination**

373 The miRNA precursor file was obtained from miRbase<sup>49</sup> v22, extracting entries annotated as  
374 “primary transcript” (corresponds to pre-miRNA) and lifting over to hg19 using CrossMap<sup>50</sup>. The  
375 resulting file was crossed with our list of 205 expressed miRNAs (BEDTools<sup>51</sup> intersect, v2.29.0)  
376 to keep only relevant entries (n=176; GSE178127: 176\_precursor\_cleaned\_hg19.bed).

### 377 **Primary miRNA determination and quantification**

378 To assess expression of primary miRNAs, we used RNA-seq from siDrosha transfected HeLa cells  
379 as basis for new transcriptome assembly using StringTie<sup>52</sup> (v2.0). We retrieved transcripts  
380 overlapping with annotated miRNA precursors of interest (see above) from the newly annotated  
381 transcript file, Ensembl annotation GRCh37.87 and GRCh38.99 (lifted to hg19 using CrossMap<sup>50</sup>).  
382 After curating the resulting annotation file manually, we obtained a final reference of expressed  
383 primary transcripts in HeLa cells (GSE178127:  
384 primir\_final\_annotation\_v87\_v99\_StringTie\_hg19\_manualClean.gtf). We mapped shControl and  
385 shINTS RNA-seq data to the new primary reference and performed RSEM and DESeq2 as  
386 described above to assess differential pri-miRNA expression.



### 387 **Small RNA SLAM-seq: s4U treatment and carboxyamidomethylation**

388 Small RNA SLAM-seq and data analysis was described in Reichholf *et al.*<sup>18</sup>. ShControl, shINTS6,  
389 and shINTS11 cells were seeded at a density of  $1 \times 10^6$  cells in 10 cm dishes at d-1 in DMEM  
390 medium (Gibco, #11965-084), supplemented with 10% FBS (Atlas Biologicals, #F-0500-D).  
391 shRNA induction was started at d0 by adding Doxycycline-containing medium (Selleckchem,  
392 #S4163, 1  $\mu\text{g/ml}$ ); the medium was changed every 24h. Two days after shRNA induction  
393 (corresponds to timepoint 0min), cells were additionally treated with 200  $\mu\text{M}$  4-Thiouridine (s4U,  
394 Cayman chemical, #16373). Parallel controls without s4U treatment were performed. Medium was  
395 exchanged every 3h during metabolic labeling to ensure homogenous incorporation and cells were  
396 kept from light exposure. At the respective timepoints (0min, 15min, 30min, 1h, 3h, 6h, 12h, 24h),  
397 cells were lysed directly on plate using TRIzol reagent (Thermo Fisher Scientific, #15596026) and  
398 samples were stored at  $-80^\circ\text{C}$  until further processing. While protected from light, RNA was  
399 extracted according to the manufacturer's instructions in presence of 0.1 mM DTT.  
400 Carboxyamidomethylation was performed as in described by Herzog *et al.*<sup>53</sup>. 40 ng RNA were  
401 treated with 10 mM Iodoacetamide (IAA, Sigma, #I1149-5g) dissolved in 100% Ethanol in  
402 presence of 50 mM  $\text{NaPO}_4$  and 50% DMSO at  $50^\circ\text{C}$  for 50 min. After quenching the reaction with  
403 1 M DTT, RNA was Ethanol precipitated, followed by DNase treatment (Invitrogen, #AM1907).  
404 SmRNA libraries were prepared as described above using 800 ng of RNA containing 40 ng  
405 *Drosophila melanogaster* RNA as spike-in and sequenced with the Novaseq 6000 system  
406 (Illumina) to 40 – 90 million reads per sample.

### 407 **Small RNA SLAM-seq: Bioinformatic processing**

408 SmRNA sequencing reads were treated as described above and mapped to repetitive regions. The  
409 resulting unmapped reads were mapped to a fasta file of 176 expressed miRNA precursors (as

410 determined above) extended for 20 bp at their 3'end (GSE178127:  
411 176\_precursor\_cleaned\_hg19\_ext20bp.fasta), while allowing for six mismatches using STAR  
412 v2.5.3a<sup>39</sup>. Minus strand miRNA precursors were annotated as reverse complement to allow all  
413 miRNAs to be treated as plus strand. Mapping smRNA-seq reads to the precursor file and applying  
414 a minimum threshold of 1 miRNA per million reads in all samples, we analyzed 126 miRNAs.  
415 Reads containing s4U-induced T>C conversions with a minimum base quality score of 27 were  
416 detected and analyzed as described in Reichholf *et al.*<sup>18</sup>  
417 (<https://github.com/breichholf/smRNAseq>). Background (0min timepoint) was subtracted from  
418 the final RPM normalized reads. Median half-life was calculated based the T>C labeled fraction  
419 per timepoint, relative to shControl 24h, by nonlinear regression one phase decay analyses  
420 performed in GraphPad PRISM 8.0.

#### 421 **Flag affinity purification**

422 HEK293 stable cells overexpressing Flag-INTS11<sup>8</sup> and Flag-Ago2<sup>15</sup> were cultured in DMEM  
423 media (Gibco, #11965-084) containing puromycin and supplemented with 10% FBS (Atlas  
424 Biologicals, #F-0500-D). For Flag-INTS11 purification, nuclear lysate was extracted using buffer  
425 containing 20 mM Tris-HCl (pH 7.9), 1.5 mM MgCl<sub>2</sub>, 0.42 M NaCl, 25% glycerol, 0.5 mM DTT,  
426 0.2 mM EDTA, 0.2 mM PMSF. For Flag-Ago2, cytoplasmic lysate was extracted using buffer  
427 containing 10 mM Tris-HCl (pH 7.9), 1.5 mM MgCl<sub>2</sub>, 10mM KCl, 0.5 mM DTT, 0.2 mM PMSF.  
428 Both complexes were purified from extract using anti-FLAG M2 affinity gel (Sigma). After  
429 washing twice with the buffer BC500 (20 mM Tris (pH 7.6), 0.2 mM ETDA, 10 mM 2-  
430 mercaptoethanol, 10% glycerol, 0.2 mM PMSF and 0.5 M KCl), and three times with buffer  
431 BC150 (20 mM Tris (pH 7.6), 0.2 mM ETDA, 10 mM 2-mercaptoethanol, 10% glycerol, 0.2 mM  
432 PMSF and 150 mM KCl), the affinity columns were eluted with FLAG peptide.

### 433 **RNA immunoprecipitation (RIP)**

434 RIP was performed as described in Peritz *et al.*<sup>54</sup>. Protein A/G magnetic beads (Thermo Scientific,  
435 #26126) were rotated 16 hours with 10 µg Ago2 antibody (Abcam, ab57113). Cells were lysed in  
436 fresh polysome lysis buffer (100 mM KCl, 5 mM MgCl<sub>2</sub>, 10 mM HEPES (pH 7.0), 0.5% NP40, 1  
437 mM DTT, 0.04 U/ml Superase-in RNase inhibitor (Ambion, #AM2694), Halt protease and  
438 phosphatase inhibitor cocktail (Thermo Scientific, #1861282)) and lysate was cleared by  
439 centrifugation. Protein concentration was determined using BCA protein assay and 350 µg protein  
440 lysate inserted in the IP reaction. After 16 hours, beads were directly lysed in 400 µl Trizol reagent  
441 (Thermo Fisher Scientific, #15596026) and RNA isolation was performed following the  
442 manufacturer's instructions. For s4U-containing samples, IPs were performed in the absence of  
443 light and 2 pmol of synthetic ath-miR159a RNA was spiked-in after IP, to correct for isolation  
444 bias. RNA was isolated in presence of 0.1 mM DTT, resuspended in H<sub>2</sub>O, 1 mM DTT and the  
445 entire IP inserted in carboxyamidomethylation reaction as described above. After DNase treatment  
446 and final Phenol/Chloroform purification, equal volumes of IP RNA (400 – 600 ng RNA per IP)  
447 were subjected to smRNA library preparation as described previously. Sequencing data was treated  
448 as described above with the adjustment of mapping to ath-miR159a precursor prior to hsa-miRNA  
449 precursor mapping as described above, with the relative number of mapped reads serving as  
450 correction factor.

### 451 **eCLIP**

452 eCLIP was performed in duplicates as previously described in Van Nostrand *et al.*<sup>30</sup>, optimized for  
453 the detection of mature miRNAs by increasing RNase I (Ambion, #AM2294) concentration from  
454 40 U/ml to 200 U/ml. In brief, 2 x 10<sup>7</sup> HeLa cells were crosslinked by UV-C irradiation (254 nm,  
455 400 mJ/cm<sup>2</sup>) and lysed on ice followed by sonication. The lysate was subjected to RNase I

456 (Ambion, #AM2294) digest (200 U/ml) in presence of murine RNase inhibitor (NEB, #M0314L)  
457 and 4 U/ml Turbo DNase (Ambion, AM2238). 4 µg of antibody (INTS11 (Sigma Prestige,  
458 #HPA029025), CPSF73 (Bethyl Laboratories, #A301-091A), rabbit IgG isotype control  
459 (Invitrogen, #02-6102)) was pre-incubated with Dynabeads M-280 Sheep Anti-Rabbit IgG  
460 (Invitrogen, #11204D) for 1 hour and added to the lysates for immunoprecipitation at 4°C for 16  
461 hours. 2% of the lysate were removed and stored as size-matched input controls. Co-  
462 immunoprecipitated RNA was dephosphorylated, followed by on-bead 3'RNA adapter ligation  
463 using high concentration T4 RNA Ligase I (NEB, #M0204L). IP efficiency was verified by  
464 immunoblot of 20% of the IP samples. Input controls and 80% of the IPed protein-RNA complexes  
465 were run on a NuPAGE 4-12% Bis-Tris Plus Gels (Invitrogen, NP0321BOX), transferred to  
466 nitrocellulose membrane (Invitrogen, #IB23001) and the desired size range (protein size + 75 kDa)  
467 was cut from the membrane for IP and size-matched input samples. To extract RNA, nitrocellulose  
468 membranes were finely fragmented and treated with Urea/ Proteinase K, followed by acid phenol-  
469 chloroform extraction and purification using RNA Clean & Concentrator column cleanup (Zymo  
470 Research, #R1014). Input samples were also dephosphorylated and ligated to 3'RNA adapter.  
471 After reverse transcription (AffinityScript reverse transcriptase, Agilent, #600107), excess  
472 oligonucleotides were removed with exonuclease (ExoSAP-IT, Affymetrix, #78201), and the  
473 remaining RNA hydrolyzed by NaOH. A 3' DNA Linker was ligated to the cDNA, and the  
474 resulting library was PCR amplified using Q5 Ultra II Master Mix (NEB, # M0544S). The library  
475 was size selected by agarose gel electrophoresis and column purified (Qiagen, MinElute, #28606).  
476 Single-end sequencing was performed to an average of 30 million reads per sample using Illumina  
477 NovaSeq 6000. Data was processed according to Van Nostrand *et al.*<sup>30</sup> and  
478 <https://github.com/YeoLab/eclip>. After double adapter trimming (cutadapt<sup>38</sup> v1.14), resulting

479 reads were first mapped against the repetitive genome using STAR<sup>39</sup> (v2.7.6a), the unmapped  
480 output was aligned against the human genome (hg19). PCR duplicates were removed by umi-  
481 tools<sup>55</sup> (v1.0.0) and the samples were visualized in UCSC<sup>40</sup>.

#### 482 **Ago2 cleavage assay**

483 Ago2 cleavage assay was performed as previously described by Gregory *et al.*<sup>6</sup> and the following  
484 modifications. Oligo RNAs were purchased from IDT: dme-let-7a-5p\_guide  
485 (/5Phos/UGAGGUAGUAGGUUGUAUAGU), dme-let-7a-3p\_passenger  
486 (/5Phos/UAUACAAUGUGCUAGCUUUCU), dme-let-7a\_target  
487 (/5IRD700/UAUACAACCUACUACCUCAUU). MiRNA duplex was prepared by mixing equal  
488 volumes of both dme-let-7a-5p\_guide and dme-let-7a-3p\_passenger oligos in annealing buffer (10  
489 mM Tris, pH 8, 50 mM NaCl, 1 mM EDTA), incubating at 95 °C for 3 min and cooling gradually  
490 to room temperature for 1 hour. Either 0.025 µg of recombinant Ago2 (rAgo2, Active Motif,  
491 #31486), or rAgo2 in combination with increasing concentrations of affinity-purified Flag-INTS11  
492 were preincubated with the 5 nM of miRNA duplex in buffer containing 3.2 mM MgCl<sub>2</sub>, 1 mM  
493 ATP, 20 mM creatine phosphate, 0.2 U/µl RNasin, 20 mM Tris-HCl (pH 8), 0.1 M KCl, 10%  
494 glycerol for 30 min at 37°C. Then, 10 nM dme-let-7a\_target was added and the cleavage reaction  
495 was incubated for 90 min at 37°C, stopped by adding Proteinase K for 30 min at room temperature.  
496 Samples were loaded onto a 15% TBE-Urea gels (Biorad, #4566055), visualized using Odyssey  
497 CLx Imaging System, and quantified by Image Studio Light (v5.2).

#### 498 **Data availability**

499 All sequencing data generated in this study is made available at the Gene Expression Omnibus  
500 (GEO). The accession number for the raw and processed data reported in this paper is GSE178127.  
501 Our previously reported PRO-seq data set is available under the accession GSE125535.

## 502 **Code availability**

503 Code available upon request.

## 504 **Methods references**

- 505 6 Gregory, R. I., Chendrimada, T. P., Cooch, N. & Shiekhattar, R. Human RISC couples  
506 microRNA biogenesis and posttranscriptional gene silencing. *Cell* **123**, 631-640,  
507 doi:10.1016/j.cell.2005.10.022 (2005).
- 508 8 Baillat, D. *et al.* Integrator, a Multiprotein Mediator of Small Nuclear RNA Processing,  
509 Associates with the C-Terminal Repeat of RNA Polymerase II. *Cell* **123**, 265-276,  
510 doi:10.1016/j.cell.2005.08.019 (2005).
- 511 10 Beckedorff, F. *et al.* The Human Integrator Complex Facilitates Transcriptional  
512 Elongation by Endonucleolytic Cleavage of Nascent Transcripts. *CellReports* **32**, 107917,  
513 doi:10.1016/j.celrep.2020.107917 (2020).
- 514 15 Chendrimada, T. P. *et al.* TRBP recruits the Dicer complex to Ago2 for microRNA  
515 processing and gene silencing. *Nature* **436**, 740-744, doi:10.1038/nature03868 (2005).
- 516 18 Reichholf, B. *et al.* Time-Resolved Small RNA Sequencing Unravels the Molecular  
517 Principles of MicroRNA Homeostasis. *Mol Cell* **75**, 756-768 e757,  
518 doi:10.1016/j.molcel.2019.06.018 (2019).
- 519 30 Van Nostrand, E. L. *et al.* Robust, Cost-Effective Profiling of RNA Binding Protein  
520 Targets with Single-end Enhanced Crosslinking and Immunoprecipitation (seCLIP).  
521 *Methods Mol Biol* **1648**, 177-200, doi:10.1007/978-1-4939-7204-3\_14 (2017).
- 522 36 Gardini, A. *et al.* Integrator Regulates Transcriptional Initiation and Pause Release  
523 following Activation. *Molecular cell* **56**, 128-139, doi:10.1016/j.molcel.2014.08.004  
524 (2014).
- 525 37 Bhatt, D. M. *et al.* Transcript dynamics of proinflammatory genes revealed by sequence  
526 analysis of subcellular RNA fractions. *Cell* **150**, 279-290, doi:10.1016/j.cell.2012.05.043  
527 (2012).
- 528 38 Martin, M. Cutadapt Removes Adapter Sequences from High-Throughput Sequencing  
529 Reads. *EMBnet Journal* **17**, 10-12 (2011).
- 530 39 Dobin, A. *et al.* STAR: ultrafast universal RNA-seq aligner. *Bioinformatics* **29**, 15-21,  
531 doi:10.1093/bioinformatics/bts635 (2013).
- 532 40 Kent, W. J. *et al.* The human genome browser at UCSC. *Genome Res* **12**, 996-1006,  
533 doi:10.1101/gr.229102 (2002).
- 534 41 Ramírez, F. *et al.* deepTools2: a next generation web server for deep-sequencing data  
535 analysis. *Nucleic Acids Research* **44**, W160-165, doi:10.1093/nar/gkw257 (2016).

- 536 42 Friedlander, M. R., Mackowiak, S. D., Li, N., Chen, W. & Rajewsky, N. miRDeep2  
537 accurately identifies known and hundreds of novel microRNA genes in seven animal  
538 clades. *Nucleic Acids Res* **40**, 37-52, doi:10.1093/nar/gkr688 (2012).
- 539 43 Love, M. I., Huber, W. & Anders, S. Moderated estimation of fold change and dispersion  
540 for RNA-seq data with DESeq2. *Genome biology* **15**, 550, doi:10.1186/s13059-014-  
541 0550-8 (2014).
- 542 44 R: A Language and Environment for Statistical Computing (2019).
- 543 45 Wickham, H. in *Use R!*, 1 online resource (XVI, 260 pages 232 illustrations, 140  
544 illustrations in color (Springer International Publishing : Imprint: Springer., Cham, 2016).
- 545 46 Bolger, A. M., Lohse, M. & Usadel, B. Trimmomatic: a flexible trimmer for Illumina  
546 sequence data. *Bioinformatics* **30**, 2114-2120, doi:10.1093/bioinformatics/btu170 (2014).
- 547 47 Li, B. & Dewey, C. N. RSEM: accurate transcript quantification from RNA-Seq data  
548 with or without a reference genome. *BMC Bioinformatics* **12**, 323-316,  
549 doi:10.1186/1471-2105-12-323 (2011).
- 550 48 Huntley, R. P. *et al.* The GOA database: gene Ontology annotation updates for 2015.  
551 *Nucleic Acids Res* **43**, D1057-1063, doi:10.1093/nar/gku1113 (2015).
- 552 49 Kozomara, A., Birgaoanu, M. & Griffiths-Jones, S. miRBase: from microRNA sequences  
553 to function. *Nucleic Acids Res* **47**, D155-D162, doi:10.1093/nar/gky1141 (2019).
- 554 50 Zhao, H. *et al.* CrossMap: a versatile tool for coordinate conversion between genome  
555 assemblies. *Bioinformatics* **30**, 1006-1007, doi:10.1093/bioinformatics/btt730 (2014).
- 556 51 Quinlan, A. R. & Hall, I. M. BEDTools: a flexible suite of utilities for comparing  
557 genomic features. *Bioinformatics* **26**, 841-842, doi:10.1093/bioinformatics/btq033  
558 (2010).
- 559 52 Pertea, M. *et al.* StringTie enables improved reconstruction of a transcriptome from  
560 RNA-seq reads. *Nat Biotechnol* **33**, 290-295, doi:10.1038/nbt.3122 (2015).
- 561 53 Herzog, V. A. *et al.* Thiol-linked alkylation of RNA to assess expression dynamics. *Nat*  
562 *Methods* **14**, 1198-1204, doi:10.1038/nmeth.4435 (2017).
- 563 54 Peritz, T. *et al.* Immunoprecipitation of mRNA-protein complexes. *Nat Protoc* **1**, 577-  
564 580, doi:10.1038/nprot.2006.82 (2006).
- 565 55 Smith, T., Heger, A. & Sudbery, I. UMI-tools: modeling sequencing errors in Unique  
566 Molecular Identifiers to improve quantification accuracy. *Genome Res* **27**, 491-499,  
567 doi:10.1101/gr.209601.116 (2017).

568

## 569 **Acknowledgements**

570 We thank all members of the Shiekhattar lab for discussions. We thank Brian Reichholf for his  
571 comments on s4U small RNA SLAM-seq analysis. We thank the Sylvester Comprehensive Cancer  
572 Center Oncogenomics core facility for high-throughput sequencing. This work was supported by  
573 the University of Miami Miller School of Medicine, Sylvester Comprehensive Cancer Center and  
574 grants R01 GM078455 and DP1 CA228041 from the National Institute of Health to R.S. Research

575 reported in this publication was funded by the National Cancer Institute of the National Institutes  
576 of Health under Award Number P30CA240139.

### 577 **Author contributions**

578 N.K. performed small RNA-seq, small-RNA SLAM-seq, RIP-seq, and eCLIP (with the help of  
579 M.M.T.) experiments and bioinformatic analyses. S.D. performed Immunoblot, small RNA-seq,  
580 RNA-seq, RIP-qPCR, Ago2-rescue, Flag affinity purification, and *in vitro* Ago2 cleavage  
581 experiments. P.R.C. performed PRO-seq and *in vitro* experiments. M.V. established shINTS6 cell  
582 lines. F.B. and H.G. processed RNA-seq. E.B. set up small RNA-seq. N.K. and R.S designed the  
583 experiments and wrote the manuscript.

### 584 **Competing interests**

585 The authors declare no competing interests.

### 586 **Additional information**

587 **Supplementary Information** is available for this paper.

588 **Correspondence** should be addressed to R.S.

### 589 **Extended Data Figure Legends**

590 **Extended Data Fig. 1 | Drosha-independent miRNAs are down-regulated after INTS knock-**  
591 **down. a,** Immunoblot detection of successful knock-down of INTS1, INTS3, INTS6, INTS7, and  
592 INTS11 before and after shRNA induction with Doxycyclin (Dox) at 1 µg/ml. GAPDH was used  
593 as loading control. **b,** Immunoblot of shControl before and after induction using the same INTS  
594 antibodies. **c-f,** Volcano plot comparing statistical significance and miRNA log<sub>2</sub> fold change



595 between control and knock-down cells. Significantly regulated miRNAs are depicted in red. **c**,  
596 uninduced shControl compared to induced shControl. **d**, shINTS1 compared to induced shControl.  
597 **e**, shINTS3. **f**, shINTS7. **g**, Heat map of normalized miRNA expression from shControl, shINTS6,  
598 and shINTS11 (Z-score of normalized read counts per row). Column and row orders were  
599 determined by unsupervised hierarchical clustering. **h**, Immunoblot detection of Drosha after  
600 siRNA knock-down in HeLa. **i**, Volcano plot comparing statistical significance and miRNA log<sub>2</sub>  
601 fold change between siControl and siDrosha knock-down HeLa cells. Significantly regulated  
602 miRNAs are depicted in red. Drosha-independent miRNAs are indicated. **j,k**, Relative miRNA  
603 expression levels in **j**, HeLa shControl, shINTS6, and shINTS11 cells, or **k**, HEK293T cells  
604 transfected with siControl, siINTS6, siINTS11, or siDrosha. MiRNAs were detected by specific  
605 TaqMan probes for the indicated miRNAs and relative miRNA levels were calculated against  
606 RNU43 expression and shControl/siControl using  $\Delta\Delta\text{ct}$  method. Mean  $\pm$  SEM, n = 4. Drosha-  
607 independent miRNA examples are indicated in red.

608 **Extended Data Fig. 2 | MiRNA loss does not depend on Integrator's endonucleolytic cleavage**  
609 **activity. a,b**, Volcano plot of statistical significance against log<sub>2</sub> fold change between shControl  
610 and shINTS11 cells quantifying 109 pri-miRNAs in **a**, PRO-seq (transcriptional elongation) or **b**,  
611 total RNA-seq. Significantly regulated primary-miRNAs are depicted in red. **c**, Box- and violin  
612 plot depicting the log<sub>2</sub> fold change of primary-miRNA expression obtained by total RNA-seq in  
613 the indicated knock-down cells, calculated against primary-miRNA levels in shControl or  
614 siControl cells. 109 pri-miRNAs were extracted from ENSEMBL or newly annotated transcripts  
615 based on siDrosha RNA-seq (see Material and Methods for details). **d**, Heat map of log<sub>2</sub> fold  
616 changes in transcription levels of miRNA machinery-related genes after knock-down with the  
617 indicated sh/siRNAs calculated against sh/siControl. Gene names related to miRNA machinery

618 were extracted from miRNA-containing Gene Ontology terms. Row order based on expression  
619 changes in shINTS11 cells, column order was determined by complete linkage hierarchical  
620 clustering. **e**, Immunoblot detection of the expression of miRNA biogenesis machinery and  
621 Argonaute proteins in shControl, shINTS6, and shINTS11 cells before and after induction.  
622 GAPDH was used as loading control. **f**, Example total RNA-seq profiles of indicated knock-downs  
623 depicting pre-miRNA excision at the miR-21 locus. Mature miR-21 are indicated in red, the  
624 annotated precursor is indicated in light blue. **g,h**, Cumulative total RNA-seq read densities across  
625 annotated pre-miRNAs  $\pm$  100 bp for **g**, siControl and siDrosha or **h**, shControl, shINTS6, and  
626 shINTS11 samples. **i**, Mean length [nt] percentage per miRNA ranging from 18 to 30 nucleotides  
627 detected in smRNA-seq of shControl, shINTS6, and shINTS11 cells. Mean  $\pm$  SEM. **j**, INTS11  
628 Immunoblot of shINTS11 cells stably expressing wild type INTS11 (WT) or catalytic mutant  
629 E203Q with and without shRNA induction. GAPDH was used as loading control. **k,l**, Volcano  
630 plot comparing statistical significance and miRNA log<sub>2</sub> fold change detected by smRNA-seq  
631 between shControl and **k**, WT INTS11, or **l**, E203Q INTS11 cells in shINTS11 knock-down  
632 background. Significantly regulated miRNAs are depicted in red.

633 **Extended Data Fig. 3 | S4U labeling does not affect miRNA abundance.** **a**, Scatter plot of steady  
634 state miRNA abundance [RPM] of 126 miRNAs in shControl samples with and without s4U  
635 treatment. Spearman correlation coefficient R is indicated. **b-d**, Volcano plot comparing statistical  
636 significance and miRNA log<sub>2</sub> fold change between shControl cells [24h +s4U] and **b**, shControl  
637 cells control [24h -s4U]. **c**, shINTS6 cells [24h +s4U]. **d**, shINTS11 [24h +s4U]. Significantly  
638 regulated miRNAs are depicted in red, their numbers indicated on top. **e-g**, Conversion rates for  
639 every possible nucleotide conversion were detected for the miRNAs (positions 1-18 after  
640 background normalization) in shControl after 3d of Doxycycline treatment. **e**, Without s4U but

641 with iodoacetamide (IAA) [24h -s4U +IAA]. **f**, [24h +s4U -IAA]. **g**, [24h +s4U +IAA]. Outliers  
642 were removed from representation; mean conversion rates are indicated below. **h**, Histogram  
643 representation of “T” frequency per miRNA in positions 1-18. n=126. **i**, Boxplot of the frequency  
644 of T>C conversion per read and per miRNA (n=126) in shControl cells after 24h s4U labeling and  
645 IAA treatment. The median fraction is indicated on top. **j**, Heatmap representation of the T>C  
646 miRNA expression [RPM] of 64 miRNAs (corresponding to 32 guide and passenger miRNA  
647 duplexes) during the time course of shControl (left panel), shINTS6 (middle panel), and shINTS11  
648 (right panel).

649 **Extended Data Fig. 4 | MiRNA loss is independent of subcellular localization. a**, Ago2 RIP  
650 from shControl, shINTS6, and shINTS11 cells followed by Taqman-qPCR. MiRNA levels were  
651 normalized to shControl and ath-miR-159a spike-in. Mean  $\pm$  SEM, n = 3. **b**, Immunoblot detecting  
652 Ago2 after example Ago2 RIP from induced shControl (shC), shINTS6 (sh6), and shINTS11  
653 (sh11) cells. **c**, Percentage of T>C labeled miRNAs after Ago2 RIP from induced cells without  
654 s4U treatment. Mean  $\pm$  SEM. **d**, Immunoblot detection of Ago2 in induced shControl, shINTS6,  
655 and shINTS11 cells, before and after transfection of pCMV-Flag-Ago2 plasmid. GAPDH serves  
656 as loading control. **e**, Left panel: Immunoblot detecting INTS as indicated from nuclear and  
657 cytoplasmic extracts from HEK293T and HeLa cells. Lamin B serves as nuclear control. Right  
658 panel: Signal quantification and ratio of nuclear signal/ cytoplasmic signal of two independent  
659 experiments. **f**, Box- and violin plot depicting the log<sub>2</sub> fold change of miRNA abundance per  
660 subcellular compartment obtained by smRNA-seq in the indicated knock-down cells, calculated  
661 against miRNA levels in induced shControl cells. 205 expressed miRNAs quantified by mirdeep2  
662 were taken into account. Statistics were performed using one-way ANOVA followed by Tukey’s  
663 post-hoc test. \*\*\* p < 0.001.

664 **Extended Data Fig. 5 | Integrator interacts with miRNA and Ago2. a**, Flag affinity purification  
665 of Ago2 from HEK293T cells stably overexpressing pCMV-Flag-Ago2 probed for the indicated  
666 proteins. **b**, Control Flag affinity purification from parental HEK293T cells.

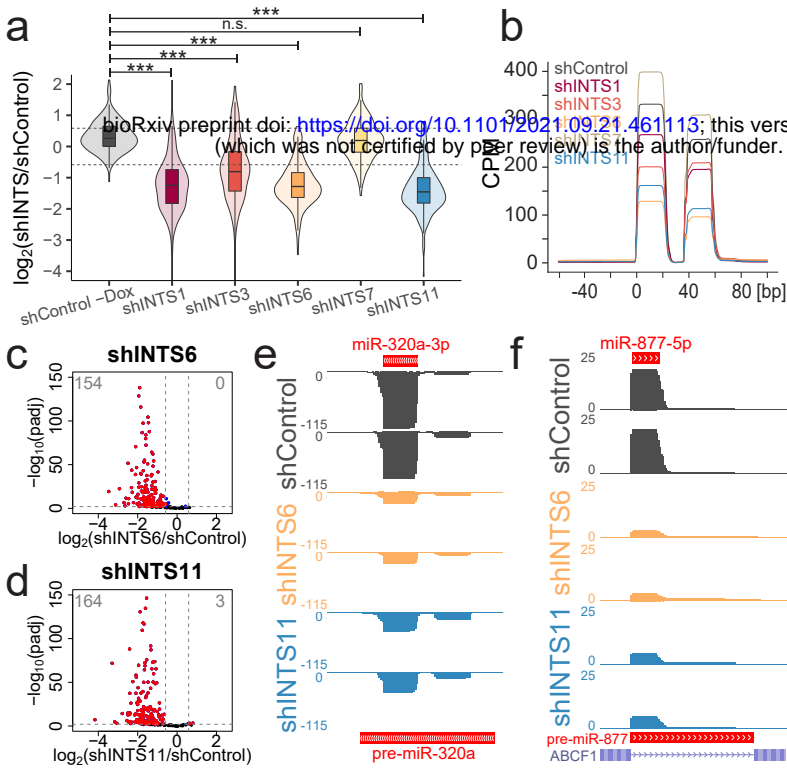

bioRxiv preprint doi: <https://doi.org/10.1101/2021.09.21.461113>; this version posted September 21, 2021. The copyright holder for this preprint (which was not certified by peer review) is the author/funder. All rights reserved. No reuse allowed without permission.

**Fig. 1 | Integrator absence leads to global miRNA loss. a,** Box- and violin plot depicting the  $\log_2$  fold change of 205 expressed miRNAs determined by smRNA-seq in the indicated knock-down or uninduced shControl HeLa cells, calculated against induced shControl cells. \*\*\*  $p < 0.001$ , one-way ANOVA followed by Tukey's post-hoc test. **b,** Global average smRNA-seq profiles around 112 5p-miRNAs aligned at their start site. **c,d,** Volcano plot comparing statistical significance and miRNA  $\log_2$  fold change between control and knock-down cells. **c,** shINTS6. **d,** shINTS11. **e,f,** SmRNA-seq profiles at Drosha-independent miRNA loci. **e,** 5'-capped miR-320a locus. **f,** mirtron miR-877 locus.

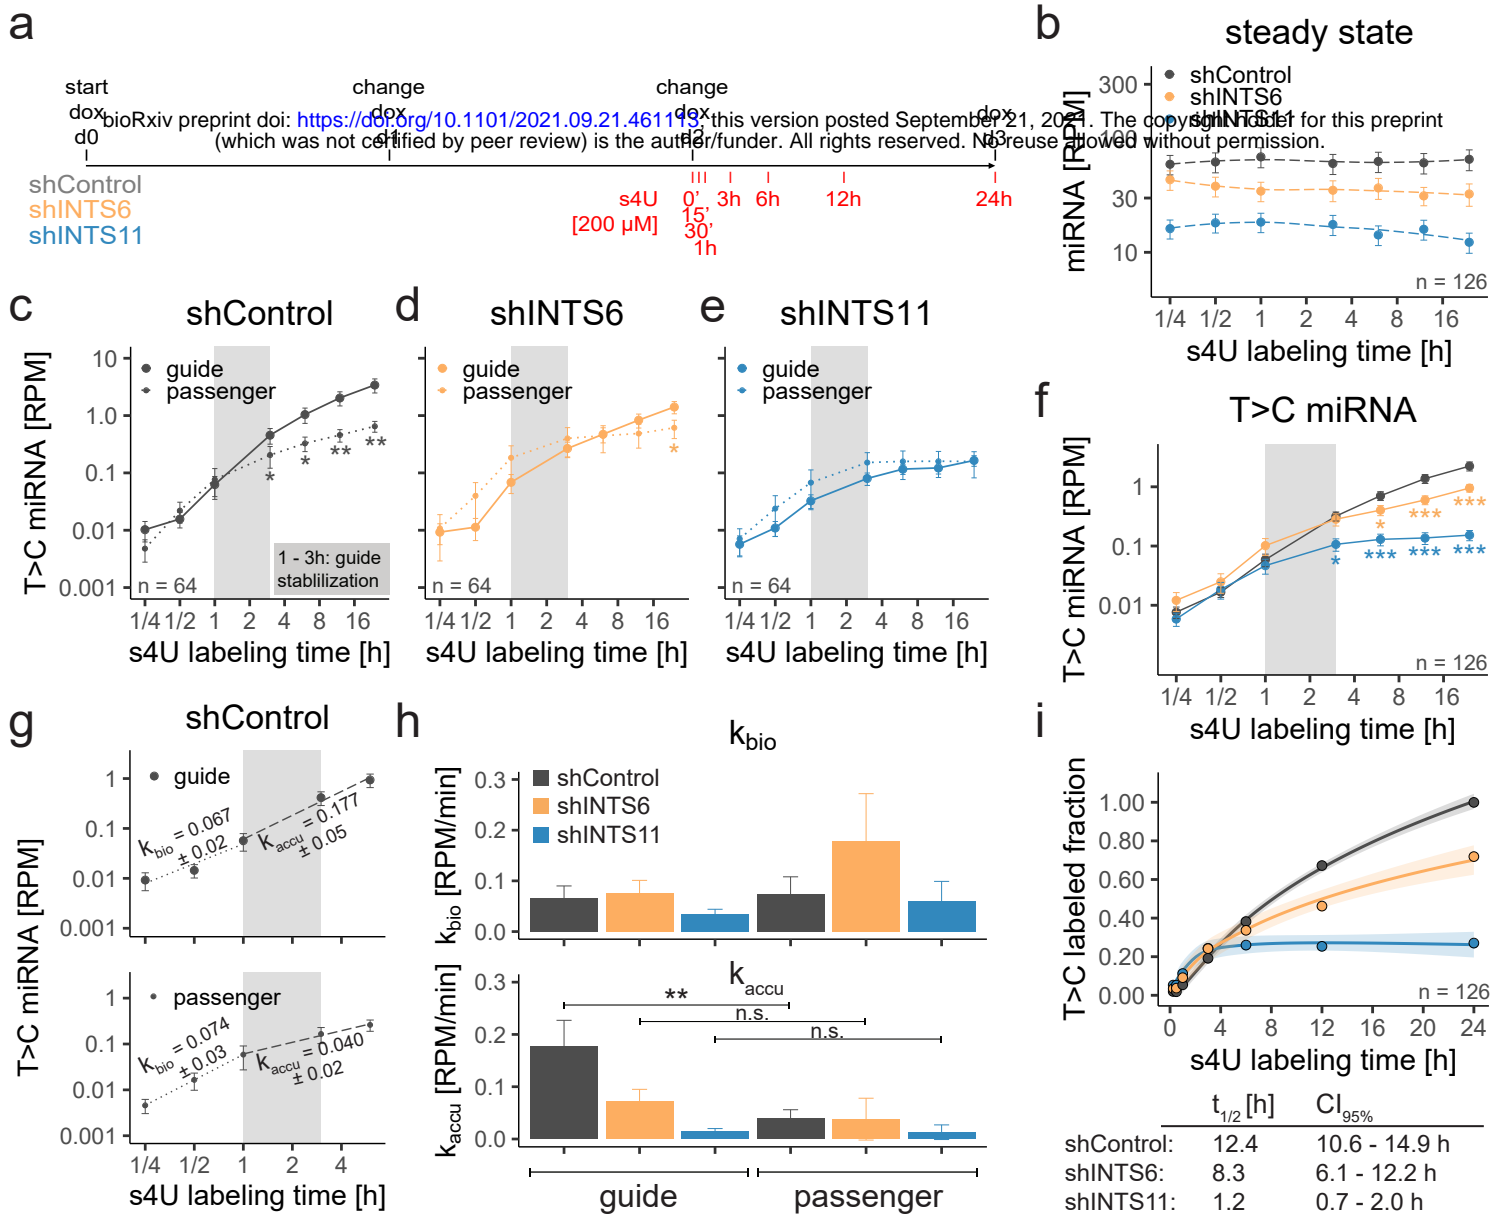

**Fig. 2 | Depletion of Integrator abolishes miRNA stabilization.** **a**, Scheme of INTS knock-down and s4U labeling. **b**, Steady state (unlabeled and T>C labeled) of miRNA expression over time. n = 126. **c-e**, T>C labeled miRNA abundance over time, separated for 32 guide or 32 passenger miRNAs. Mean  $\pm$  SEM. \* p < 0.05, \*\* p < 0.01, Mann-Whitney-Wilcoxon test. **c**, shControl. **d**, shINTS6. **e**, shINTS11. **f**, Combined T>C labeled miRNA abundance. **g**, Example of linear regression on shControl guide or passenger miRNAs. MiRNA biogenesis rates ( $k_{bio}$ ) determined from 15min to 1h, or accumulation rates ( $k_{accu}$ ) from 1h to 6h. Slope  $\pm$  standard error is indicated. **h**, Histogram of  $k_{bio}$  and  $k_{accu}$ . Mean  $\pm$  SEM. \*\* p < 0.01, one-way ANOVA followed by Tukey's post-hoc test on single miRNAs with  $k_{bio}$  or  $k_{accu}$  > 0. **i**, Single exponential saturation kinetics to calculate median half-life  $t_{1/2}$  [h] as depicted in table below including 95% confidence interval. Shades indicate SEM.

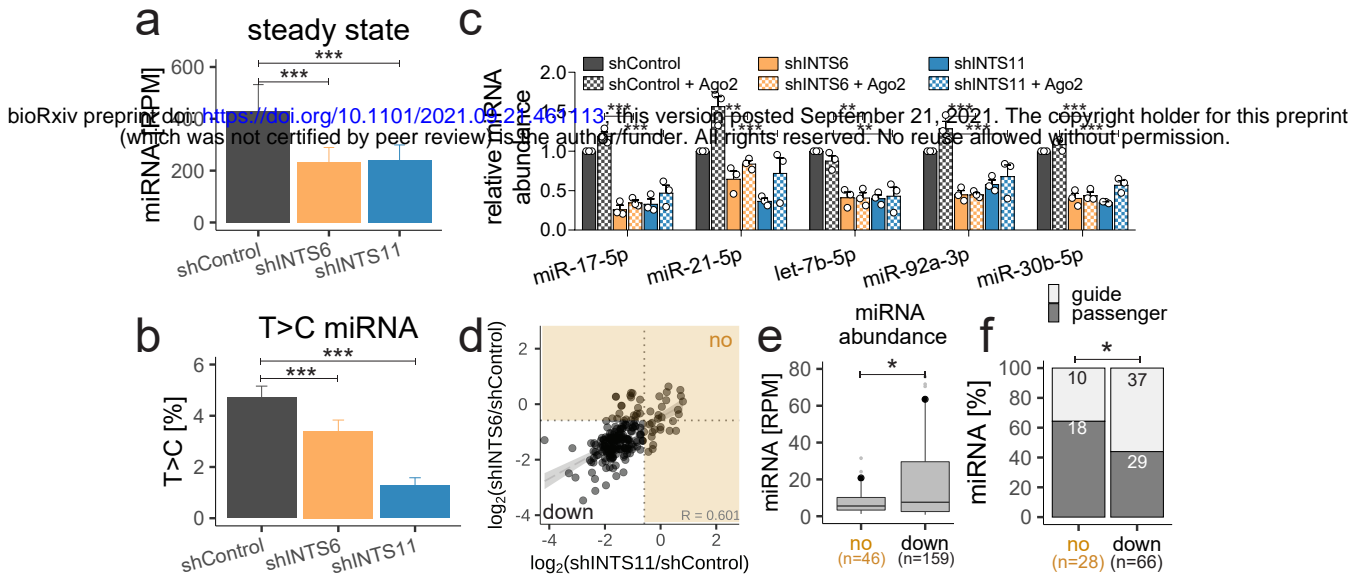

**Fig. 3 | Integrator depletion abolishes Ago2 loading.** **a**, Steady state miRNA abundance from Ago2 RIP after 24h + s4U.  $n = 122$ . **b**, T>C miRNA percentage. Mean + SEM. **c**, MiRNA TaqMan qPCR before and after Ago2 overexpression (see Extended Data Fig. 4d). MiRNA levels relative to ath-miR-159a spike-in and shControl. Mean + SEM,  $n = 3$ . \*\*  $p < 0.01$ , \*\*\*  $p < 0.001$ , one-way ANOVA followed by Dunnett's multiple comparisons test. **d**, Scatter plot of the miRNA  $\log_2$  fold change in shINTS6 and shINTS11 from Fig. 1c,d. Integrator-unregulated miRNAs are indicated by orange shaded area. (R: Spearman correlation coefficient). **e**, shControl miRNA abundance for unregulated (no) and down-regulated (down) miRNAs. \*  $p < 0.05$ , Welch two sample t-test. **f**, Percentage of guide and passenger miRNAs. Absolute miRNA numbers are indicated. \*  $p < 0.05$ , Fisher's exact test.

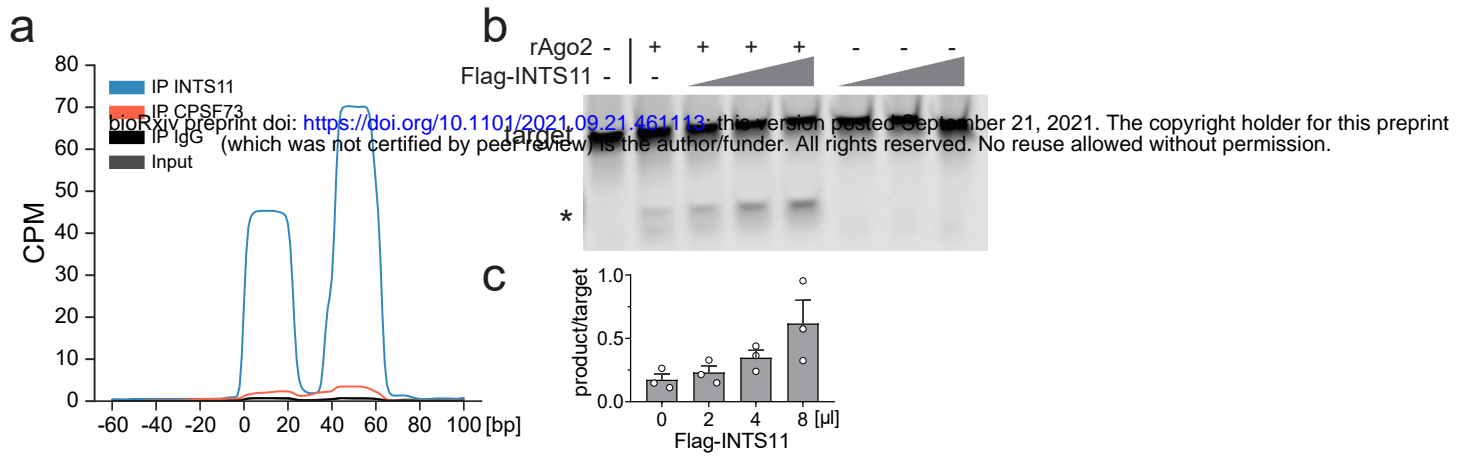

**Fig. 4 | Integrator directly enhances Ago2 target cleavage efficiency.**

**a**, Global average of INTS11, CPSF73, IgG and size-matched input eCLIP profiles around 112 5p-miRNAs aligned at their start site. **b**, Ago2 cleavage assay in presence of dme-let-7a miRNA-duplex, 5'IRDye-700 labeled guide-complementary target RNA, Ago2 and increasing concentrations of affinity purified (Flag-INTS11) Integrator complex. \* cleaved product. **c**, Quantification of the product/target ratio with increasing amounts of Integrator. Mean + SEM, n = 3.



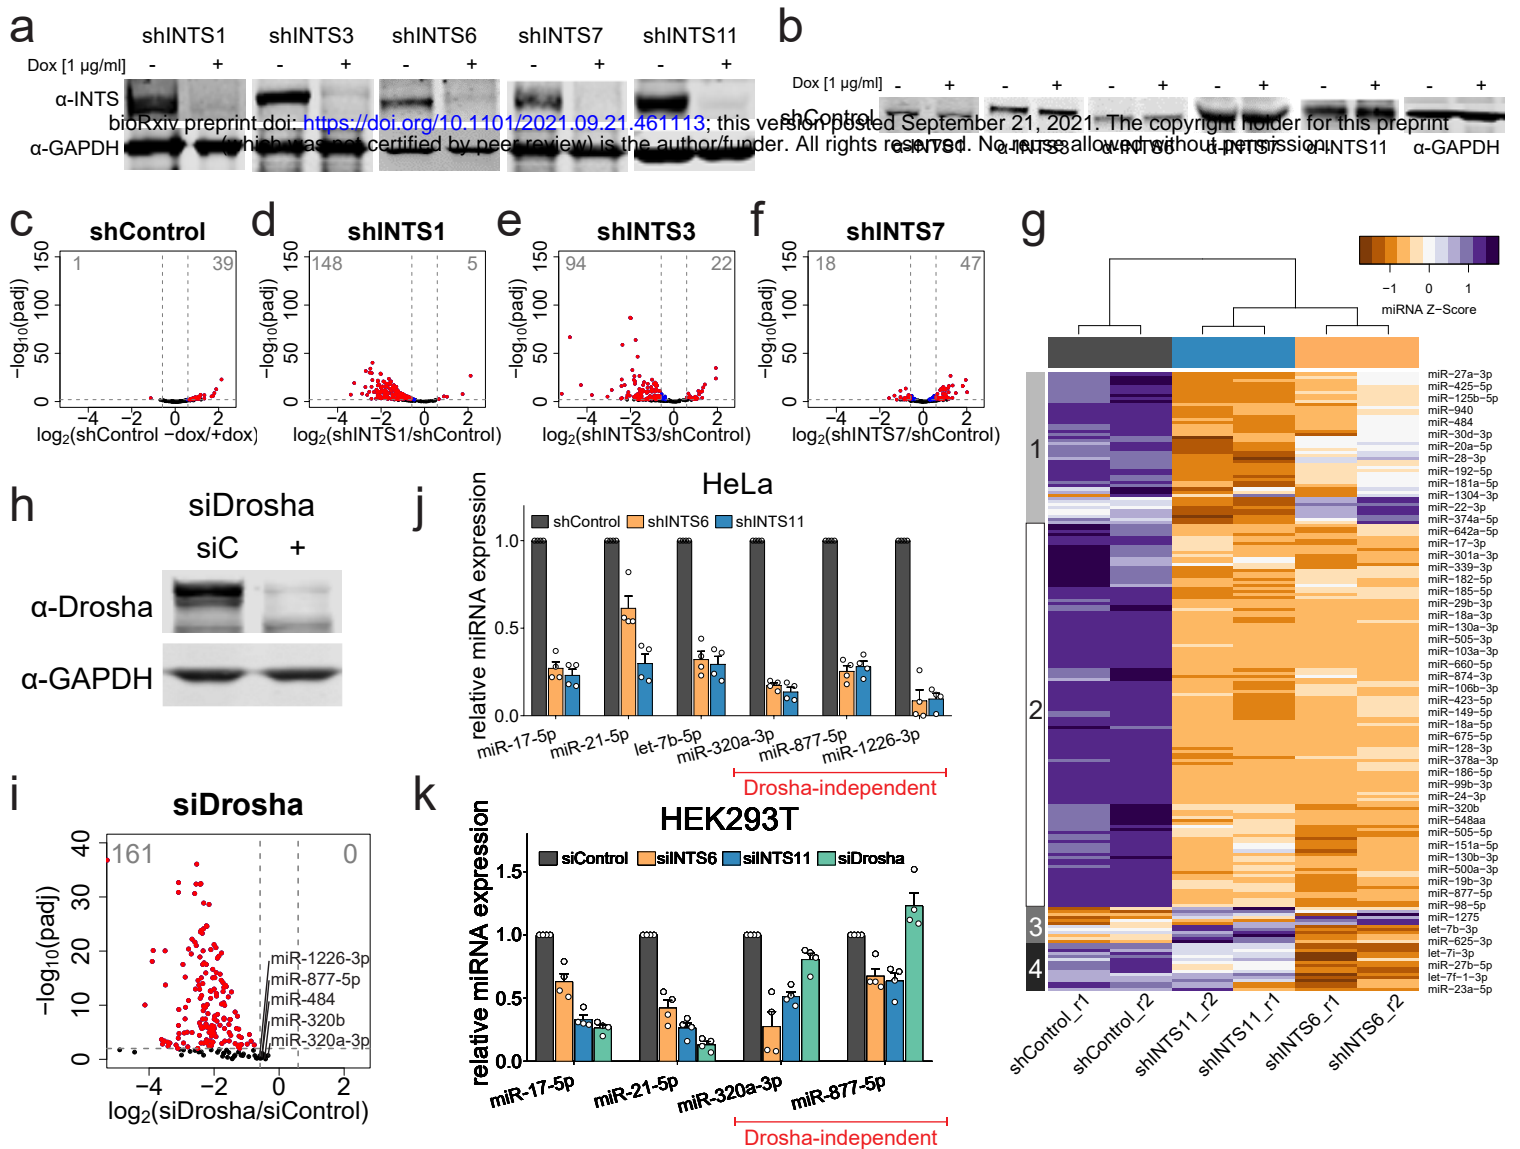

**Extended Data Fig. 1 | Drosha-independent miRNAs are down-regulated after INTS knock-down.** **a**, Immunoblot detection of successful knock-down of INTS1, INTS3, INTS6, INTS7, and INTS11 before and after shRNA induction with Doxycyclin (Dox) at 1 µg/ml. GAPDH was used as loading control. **b**, Immunoblot of shControl before and after induction using the same INTS antibodies. **c-f**, Volcano plot comparing statistical significance and miRNA  $\log_2$  fold change between control and knock-down cells. Significantly regulated miRNAs are depicted in red. **c**, uninduced shControl compared to induced shControl. **d**, shINTS1 compared to induced shControl. **e**, shINTS3. **f**, shINTS7. **g**, Heat map of normalized miRNA expression from shControl, shINTS6, and shINTS11 (Z-score of normalized read counts per row). Column and row orders were determined by unsupervised hierarchical clustering. **h**, Immunoblot detection of Drosha after siRNA knock-down in HeLa. **i**, Volcano plot comparing statistical significance and miRNA  $\log_2$  fold change between siControl and siDrosha knock-down HeLa cells. Significantly regulated miRNAs are depicted in red. Drosha-independent miRNAs are indicated. **j, k**, Relative miRNA expression levels in **j**, HeLa shControl, shINTS6, and shINTS11 cells, or **k**, HEK293T cells transfected with siControl, siINTS6, siINTS11, or siDrosha. MiRNAs were detected by specific TaqMan probes for the indicated miRNAs and relative miRNA levels were calculated against RNU43 expression and shControl/siControl using  $\Delta\Delta\text{ct}$  method. Mean + SEM, n= 4. Drosha-independent miRNA examples are indicated in red.

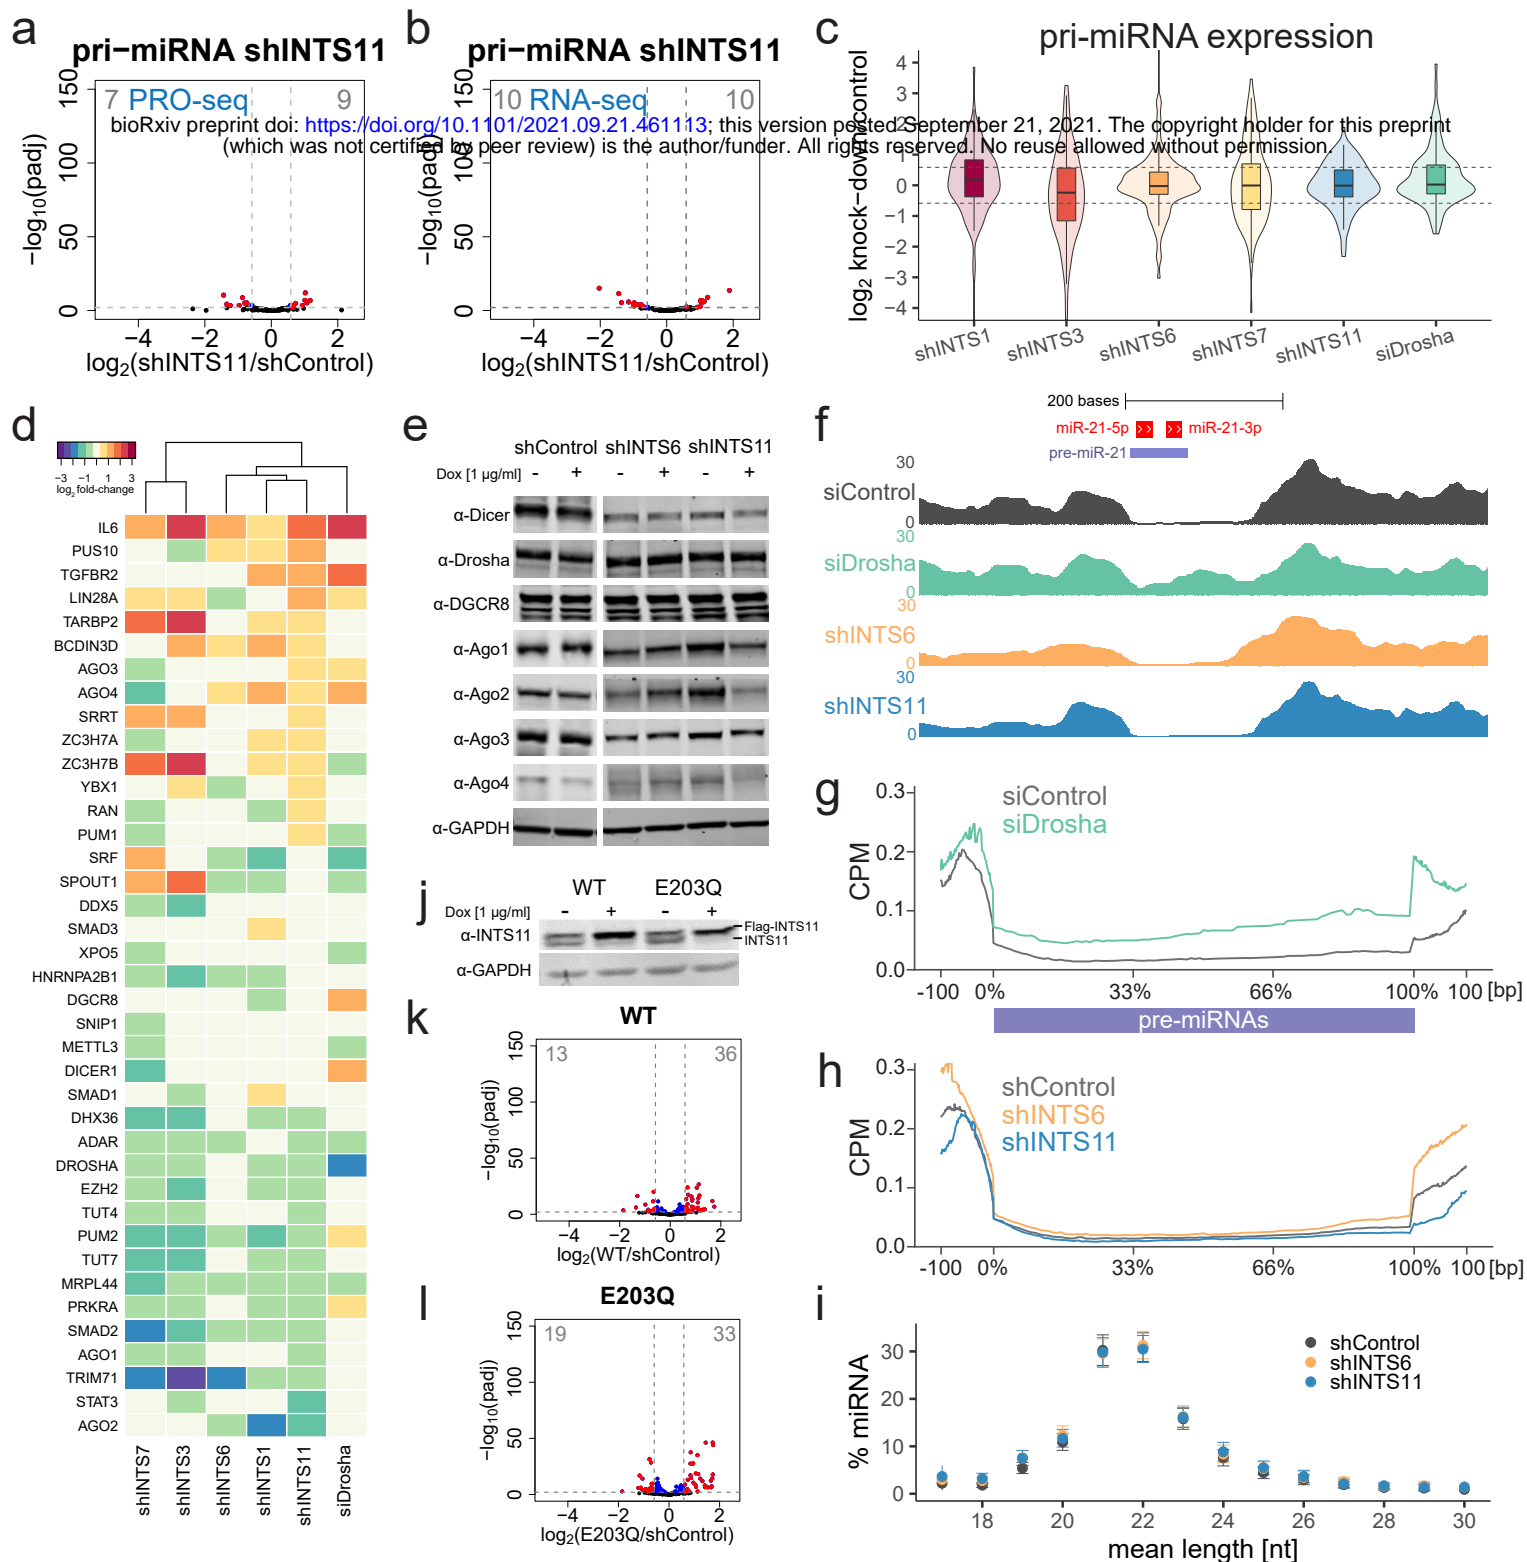

**Extended Data Fig. 2 | MiRNA loss does not depend on Integrator's endonucleolytic cleavage activity.**

**a,b**, Volcano plot of statistical significance against  $\log_2$  fold change between shControl and shINTS11 cells quantifying 109 pri-miRNAs in **a**, PRO-seq (transcriptional elongation) or **b**, total RNA-seq. Significantly regulated primary-miRNAs are depicted in red. **c**, Box- and violin plot depicting the  $\log_2$  fold change of primary-miRNA expression obtained by total RNA-seq in the indicated knock-down cells, calculated against primary-miRNA levels in shControl or siControl cells. 109 pri-miRNAs were extracted from ENSEMBL or newly annotated transcripts based on siDrosha RNA-seq (see Material and Methods for details). **d**, Heat map of  $\log_2$  fold changes in transcription levels of miRNA machinery-related genes after knock-down with the indicated sh/siRNAs calculated against sh/siControl. Gene names related to miRNA machinery were extracted from miRNA-containing Gene Ontology terms. Row order based on expression changes in shINTS11 cells, column order was determined by complete linkage hierarchical clustering. **e**, Immunoblot detection of the expression of miRNA biogenesis machinery and Argonaute proteins in shControl, shINTS6, and shINTS11 cells before and after induction. GAPDH was used as loading control. **f**, Example total RNA-seq profiles of indicated knock-downs depicting pre-miR-21 excision at the miR-21 locus. Mature miR-21 are indicated in red, the annotated precursor is indicated in light blue. **g,h**, Cumulative total RNA-seq read densities across annotated pre-miRNAs  $\pm 100$  bp for **g**, siControl and siDrosha or **h**, shControl, shINTS6, and shINTS11 samples. **i**, Mean length [nt] percentage per miRNA ranging from 18 to 30 nucleotides detected in smRNA-seq of shControl, shINTS6, and shINTS11 cells. Mean  $\pm$  SEM. **j**, INTS11 Immunoblot of shINTS11 cells stably expressing wild type INTS11 (WT) or catalytic mutant E203Q with and without shRNA induction. GAPDH was used as loading control. **k,l**, Volcano plot comparing statistical significance and miRNA  $\log_2$  fold change detected by smRNA-seq between shControl and **k**, WT INTS11, or **l**, E203Q INTS11 cells in shINTS11 knock-down background. Significantly regulated miRNAs are depicted in red.

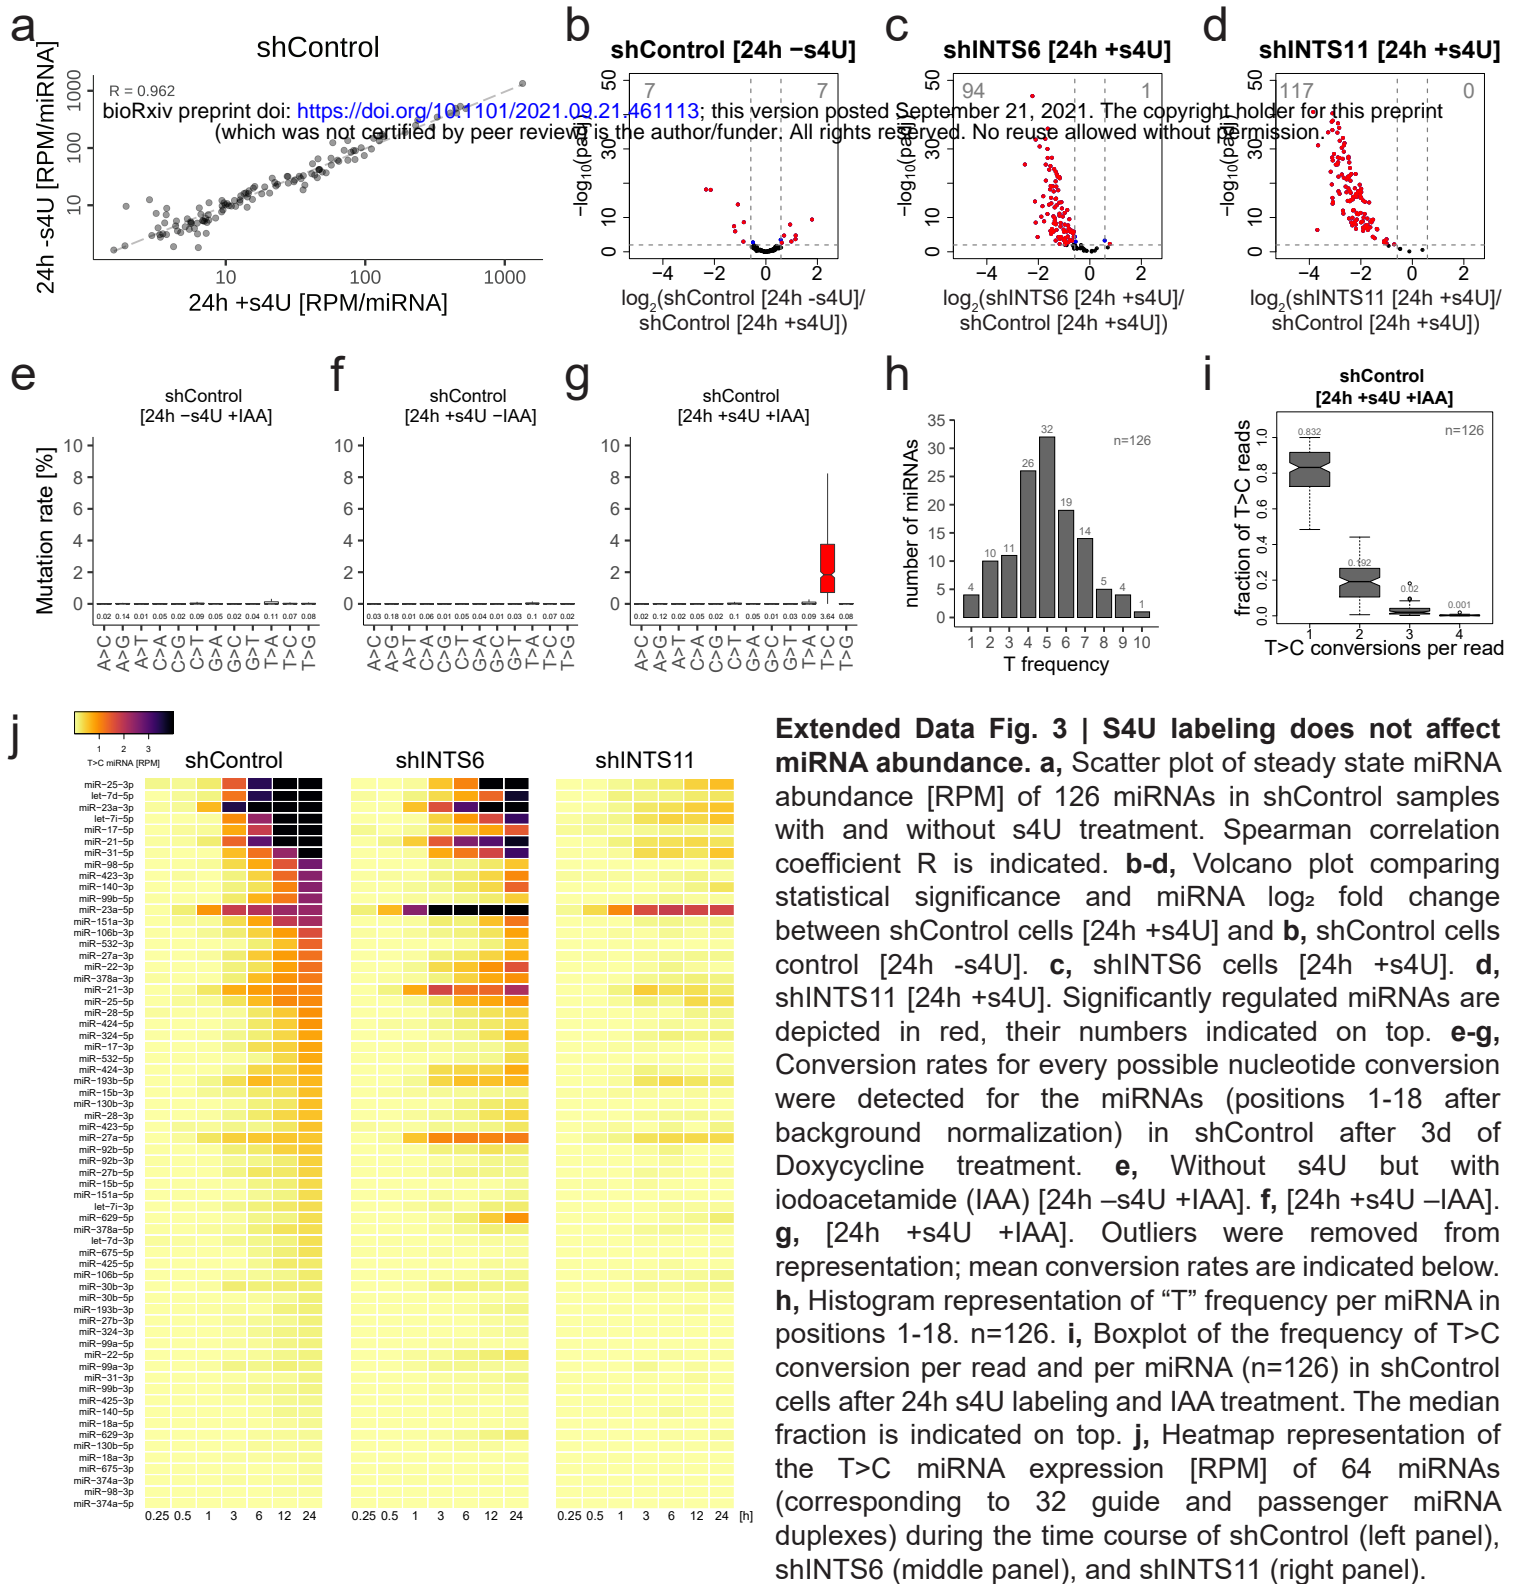

**Extended Data Fig. 3 | S4U labeling does not affect miRNA abundance.** **a**, Scatter plot of steady state miRNA abundance [RPM] of 126 miRNAs in shControl samples with and without s4U treatment. Spearman correlation coefficient  $R$  is indicated. **b-d**, Volcano plot comparing statistical significance and miRNA  $\log_2$  fold change between shControl cells [24h +s4U] and **b**, shControl cells control [24h -s4U]. **c**, shINTS6 cells [24h +s4U]. **d**, shINTS11 [24h +s4U]. Significantly regulated miRNAs are depicted in red, their numbers indicated on top. **e-g**, Conversion rates for every possible nucleotide conversion were detected for the miRNAs (positions 1-18 after background normalization) in shControl after 3d of Doxycycline treatment. **e**, Without s4U but with iodoacetamide (IAA) [24h -s4U +IAA]. **f**, [24h +s4U -IAA]. **g**, [24h +s4U +IAA]. Outliers were removed from representation; mean conversion rates are indicated below. **h**, Histogram representation of "T" frequency per miRNA in positions 1-18.  $n=126$ . **i**, Boxplot of the frequency of T>C conversion per read and per miRNA ( $n=126$ ) in shControl cells after 24h s4U labeling and IAA treatment. The median fraction is indicated on top. **j**, Heatmap representation of the T>C miRNA expression [RPM] of 64 miRNAs (corresponding to 32 guide and passenger miRNA duplexes) during the time course of shControl (left panel), shINTS6 (middle panel), and shINTS11 (right panel).

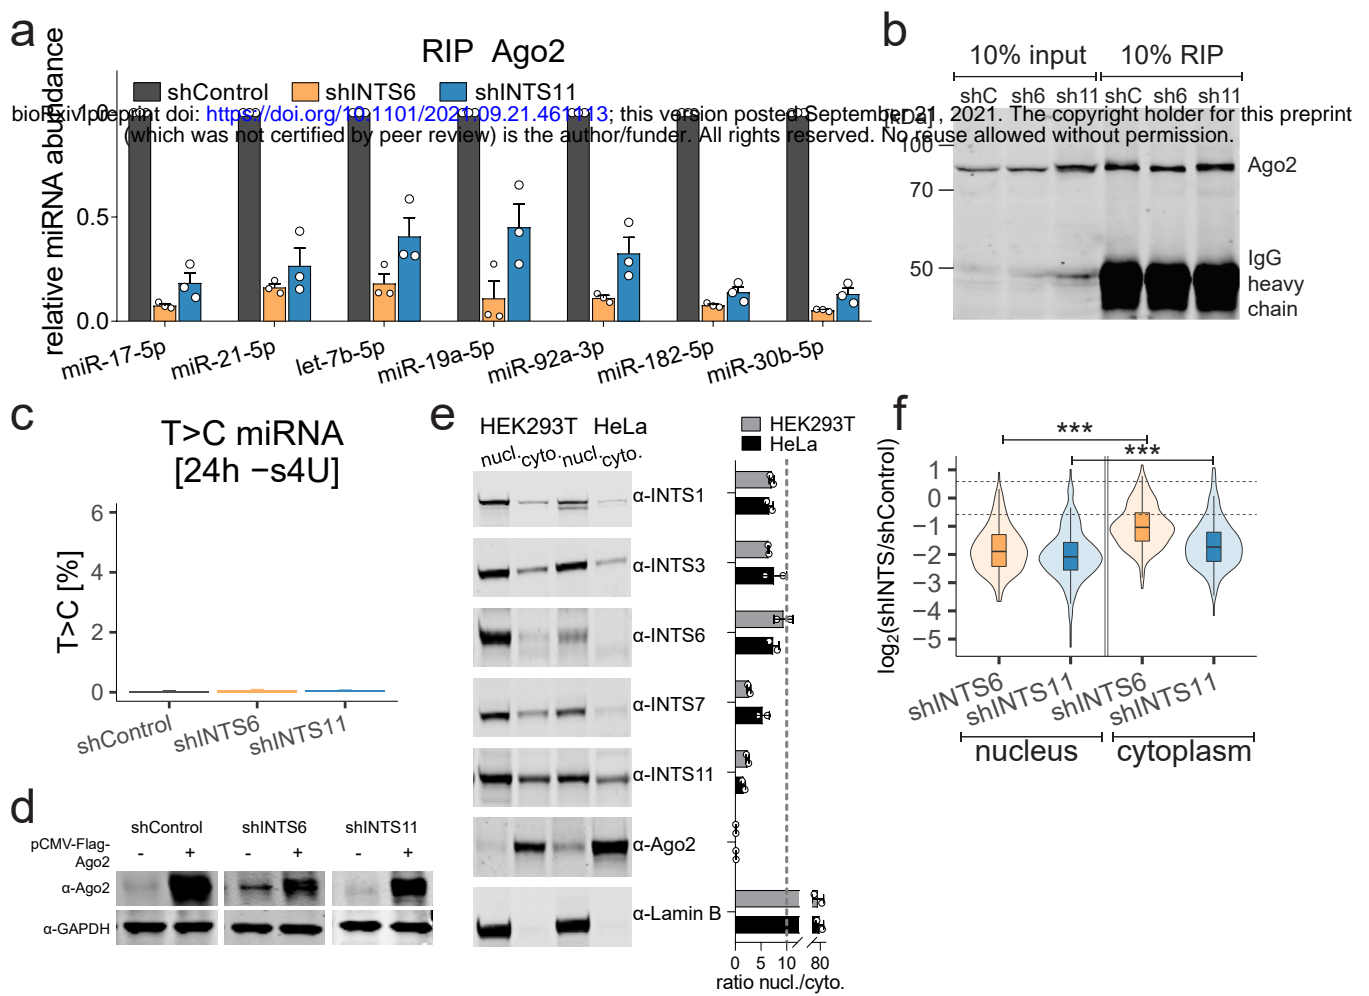

**Extended Data Fig. 4 | MiRNA loss is independent of subcellular localization.** **a**, Ago2 RIP from shControl, shINTS6, and shINTS11 cells followed by Taqman-qPCR. MiRNA levels were normalized to shControl and ath-miR-159a spike-in. Mean  $\pm$  SEM,  $n = 3$ . **b**, Immunoblot detecting Ago2 after example Ago2 RIP from induced shControl (shC), shINTS6 (sh6), and shINTS11 (sh11) cells. **c**, Percentage of T>C labeled miRNAs after Ago2 RIP from induced cells without s4U treatment. Mean  $\pm$  SEM. **d**, Immunoblot detection of Ago2 in induced shControl, shINTS6, and shINTS11 cells, before and after transfection of pCMV-Flag-Ago2 plasmid. GAPDH serves as loading control. **e**, Left panel: Immunoblot detecting INTS as indicated from nuclear and cytoplasmic extracts from HEK-293T and HeLa cells. Lamin B serves as nuclear control. Right panel: Signal quantification and ratio of nuclear signal/ cytoplasmic signal of two independent experiments. **f**, Box- and violin plot depicting the  $\log_2$  fold change of miRNA abundance per subcellular compartment obtained by smRNA-seq in the indicated knock-down cells, calculated against miRNA levels in induced shControl cells. 205 expressed miRNAs quantified by mirdeep2 were taken into account. Statistics were performed using one-way ANOVA followed by Tukey's post-hoc test. \*\*\*  $p < 0.001$ .

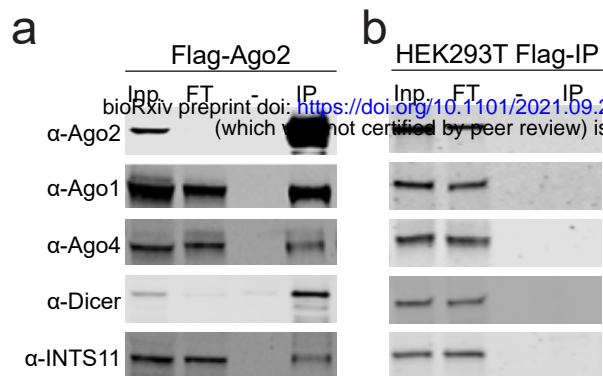

**Extended Data Fig. 5 | Integrator interacts with miRNA and Ago2.** **a**, Flag affinity purification of Ago2 from HEK293T cells stably overexpressing pCMV-Flag-Ago2 probed for the indicated proteins. **b**, Control Flag affinity purification from parental HEK293T cells.
